# Supplementary material for: The Gasdermin E Gene Has Potential as a Pan-Cancer Biomarker, While Discriminating between Different Tumor Types
Source: PubMed Central journal article supplement (PMC6896019; doi:10.3390/cancers11111810), 2019-11-18
Supplement: cancers-11-01810-s001.pdf [file cancers-11-01810-s001.pdf]

# The *Gasdermin E* gene Potential as a Pan-Cancer Biomarker, While Discriminating between Different Tumor Types

Joe Ibrahim, Ken Op de Beeck, Erik Franssen, Marc Peeters and Guy Van Camp

**Table S1.** Differences in GSDME CpG methylation ( $\beta$ -value) between normal and tumour tissue samples across the 14 different cancer types.

| Probe      | Mean Diff | Se Diff  | KR_p-value | Mean TP  | SD mean TP | SEM TP   | Mean NT  | SD mean NT | SEM NT   | Tumour Type |
|------------|-----------|----------|------------|----------|------------|----------|----------|------------|----------|-------------|
| cg17790129 | -1.19E-01 | 2.96E-02 | 3.31E-04*  | 7.63E-01 | 2.11E-01   | 1.03E-02 | 8.92E-01 | 2.29E-02   | 5.00E-03 | BLCA        |
| cg14205998 | -7.37E-02 | 1.93E-02 | 6.77E-04*  | 8.10E-01 | 1.92E-01   | 9.42E-03 | 9.33E-01 | 1.32E-02   | 2.88E-03 | BLCA        |
| cg04317854 | -3.01E-02 | 3.05E-02 | 3.36E-01   | 6.87E-01 | 1.96E-01   | 9.58E-03 | 7.21E-01 | 7.54E-02   | 1.65E-02 | BLCA        |
| cg12922093 | -1.07E-01 | 2.85E-02 | 7.08E-04*  | 7.12E-01 | 1.98E-01   | 9.69E-03 | 8.49E-01 | 3.27E-02   | 7.13E-03 | BLCA        |
| cg17569154 | -1.19E-01 | 3.87E-02 | 4.02E-03*  | 5.71E-01 | 2.24E-01   | 1.10E-02 | 7.45E-01 | 9.99E-02   | 2.18E-02 | BLCA        |
| cg19260663 | -1.31E-01 | 2.94E-02 | 8.91E-05*  | 7.38E-01 | 2.03E-01   | 9.92E-03 | 9.13E-01 | 2.95E-02   | 6.44E-03 | BLCA        |
| cg09333471 | 2.33E-03  | 1.93E-02 | 9.05E-01   | 2.10E-01 | 1.35E-01   | 6.58E-03 | 2.03E-01 | 5.29E-02   | 1.15E-02 | BLCA        |
| cg00473134 | 6.60E-03  | 1.18E-02 | 5.83E-01   | 1.06E-01 | 1.16E-01   | 5.66E-03 | 7.61E-02 | 3.05E-02   | 6.65E-03 | BLCA        |
| cg03995857 | 4.37E-02  | 2.05E-02 | 4.25E-02*  | 1.45E-01 | 1.51E-01   | 7.36E-03 | 9.67E-02 | 3.61E-02   | 7.87E-03 | BLCA        |
| cg07320646 | 4.39E-02  | 2.54E-02 | 9.58E-02   | 9.55E-02 | 1.86E-01   | 9.08E-03 | 3.31E-02 | 2.24E-02   | 4.89E-03 | BLCA        |
| cg07293520 | 1.63E-02  | 1.37E-02 | 2.48E-01   | 7.63E-02 | 1.36E-01   | 6.66E-03 | 3.83E-02 | 3.86E-02   | 8.42E-03 | BLCA        |
| cg04770504 | 5.16E-02  | 1.85E-02 | 9.37E-03*  | 9.72E-02 | 1.54E-01   | 7.54E-03 | 2.35E-02 | 1.15E-02   | 2.51E-03 | BLCA        |
| cg24805239 | 5.96E-02  | 2.22E-02 | 1.16E-02*  | 1.37E-01 | 1.46E-01   | 7.16E-03 | 7.32E-02 | 3.20E-02   | 6.99E-03 | BLCA        |
| cg01733570 | -2.17E-02 | 2.76E-02 | 4.43E-01   | 4.38E-01 | 1.80E-01   | 8.79E-03 | 4.73E-01 | 5.34E-02   | 1.17E-02 | BLCA        |
| cg25723149 | 1.91E-02  | 3.16E-02 | 5.54E-01   | 4.14E-01 | 1.91E-01   | 9.34E-03 | 4.07E-01 | 5.97E-02   | 1.30E-02 | BLCA        |
| cg22804000 | 1.92E-03  | 2.85E-02 | 9.47E-01   | 3.88E-01 | 1.75E-01   | 8.55E-03 | 4.15E-01 | 4.61E-02   | 1.01E-02 | BLCA        |
| cg07504598 | 1.15E-01  | 2.92E-02 | 3.09E-04*  | 6.15E-01 | 1.62E-01   | 7.91E-03 | 5.17E-01 | 6.34E-02   | 1.38E-02 | BLCA        |
| cg15037663 | 6.80E-02  | 2.79E-02 | 2.05E-02*  | 6.75E-01 | 1.60E-01   | 7.81E-03 | 6.44E-01 | 5.12E-02   | 1.12E-02 | BLCA        |

|                   |                  |                |                   |                |                   |               |                |                   |               |                    |
|-------------------|------------------|----------------|-------------------|----------------|-------------------|---------------|----------------|-------------------|---------------|--------------------|
| <b>cg19706795</b> | 5.78E-02         | 2.09E-02       | 9.47E-03*         | 7.68E-01       | 1.34E-01          | 6.55E-03      | 7.29E-01       | 3.84E-02          | 8.39E-03      | BLCA               |
| <b>cg20764575</b> | 4.65E-02         | 2.43E-02       | 6.66E-02          | 7.68E-01       | 1.26E-01          | 6.16E-03      | 7.20E-01       | 4.70E-02          | 1.03E-02      | BLCA               |
| <b>cg06301139</b> | -2.89E-02        | 1.05E-02       | 1.06E-02*         | 8.82E-01       | 1.13E-01          | 5.52E-03      | 9.40E-01       | 1.28E-02          | 2.80E-03      | BLCA               |
| <b>cg26712096</b> | -9.12E-02        | 2.30E-02       | 4.45E-04*         | 7.60E-01       | 2.02E-01          | 9.90E-03      | 9.14E-01       | 1.81E-02          | 3.94E-03      | BLCA               |
| <b>Probe</b>      | <b>Mean Diff</b> | <b>Se Diff</b> | <b>KR_p-value</b> | <b>Mean TP</b> | <b>SD mean TP</b> | <b>SEM TP</b> | <b>Mean NT</b> | <b>SD mean NT</b> | <b>SEM NT</b> | <b>Tumour Type</b> |
| <b>cg17790129</b> | -1.18E-01        | 1.98E-02       | 1.47E-08*         | 7.62E-01       | 2.37E-01          | 8.43E-03      | 9.02E-01       | 3.88E-02          | 3.96E-03      | BRCA               |
| <b>cg14205998</b> | -1.27E-01        | 1.96E-02       | 5.72E-10*         | 7.90E-01       | 2.12E-01          | 7.54E-03      | 9.23E-01       | 2.11E-02          | 2.16E-03      | BRCA               |
| <b>cg04317854</b> | -8.05E-02        | 1.84E-02       | 1.98E-05*         | 7.42E-01       | 1.95E-01          | 6.92E-03      | 8.35E-01       | 5.91E-02          | 6.03E-03      | BRCA               |
| <b>cg12922093</b> | -1.86E-01        | 1.95E-02       | 2.65E-18*         | 6.73E-01       | 2.15E-01          | 7.64E-03      | 8.72E-01       | 3.74E-02          | 3.82E-03      | BRCA               |
| <b>cg17569154</b> | -1.69E-01        | 1.80E-02       | 2.00E-17*         | 6.85E-01       | 2.11E-01          | 7.52E-03      | 8.63E-01       | 6.18E-02          | 6.31E-03      | BRCA               |
| <b>cg19260663</b> | -1.75E-01        | 1.86E-02       | 2.69E-18*         | 7.41E-01       | 2.00E-01          | 7.10E-03      | 9.24E-01       | 2.12E-02          | 2.16E-03      | BRCA               |
| <b>cg09333471</b> | 1.62E-01         | 1.53E-02       | 3.82E-22*         | 3.41E-01       | 1.62E-01          | 5.76E-03      | 1.86E-01       | 6.62E-02          | 6.75E-03      | BRCA               |
| <b>cg00473134</b> | 1.32E-01         | 1.50E-02       | 9.90E-17*         | 2.01E-01       | 1.54E-01          | 5.49E-03      | 7.25E-02       | 2.91E-02          | 2.97E-03      | BRCA               |
| <b>cg03995857</b> | 1.98E-01         | 2.07E-02       | 3.74E-19*         | 2.81E-01       | 2.15E-01          | 7.66E-03      | 8.41E-02       | 3.88E-02          | 3.96E-03      | BRCA               |
| <b>cg07320646</b> | 1.57E-01         | 2.28E-02       | 5.50E-11*         | 1.85E-01       | 2.47E-01          | 8.77E-03      | 2.33E-02       | 1.57E-02          | 1.60E-03      | BRCA               |
| <b>cg07293520</b> | 9.66E-02         | 1.44E-02       | 2.57E-10*         | 1.31E-01       | 1.73E-01          | 6.14E-03      | 2.68E-02       | 1.03E-02          | 1.05E-03      | BRCA               |
| <b>cg04770504</b> | 1.54E-01         | 1.71E-02       | 5.75E-17*         | 1.82E-01       | 1.87E-01          | 6.66E-03      | 1.99E-02       | 1.27E-02          | 1.30E-03      | BRCA               |
| <b>cg24805239</b> | 1.71E-01         | 1.69E-02       | 1.23E-20*         | 2.30E-01       | 1.80E-01          | 6.39E-03      | 5.85E-02       | 2.69E-02          | 2.74E-03      | BRCA               |
| <b>cg01733570</b> | 1.09E-01         | 1.99E-02       | 1.10E-07*         | 5.06E-01       | 2.07E-01          | 7.38E-03      | 3.99E-01       | 1.01E-01          | 1.04E-02      | BRCA               |
| <b>cg25723149</b> | 1.98E-01         | 1.98E-02       | 5.49E-20*         | 4.86E-01       | 2.12E-01          | 7.52E-03      | 2.84E-01       | 9.26E-02          | 9.45E-03      | BRCA               |
| <b>cg22804000</b> | 1.46E-01         | 1.82E-02       | 4.88E-14*         | 4.32E-01       | 1.98E-01          | 7.03E-03      | 2.83E-01       | 6.03E-02          | 6.16E-03      | BRCA               |
| <b>cg07504598</b> | 1.99E-01         | 1.72E-02       | 1.03E-24*         | 6.00E-01       | 1.90E-01          | 6.75E-03      | 3.98E-01       | 7.74E-02          | 7.90E-03      | BRCA               |
| <b>cg15037663</b> | 1.35E-01         | 1.91E-02       | 1.22E-11*         | 6.02E-01       | 1.99E-01          | 7.09E-03      | 4.72E-01       | 7.67E-02          | 7.83E-03      | BRCA               |
| <b>cg19706795</b> | 1.08E-01         | 1.77E-02       | 3.21E-09*         | 6.66E-01       | 1.84E-01          | 6.53E-03      | 5.61E-01       | 6.99E-02          | 7.14E-03      | BRCA               |

| cg2076<br>4575 | 1.73E-01  | 1.75E-02 | 1.97E-20*  | 6.61E-01 | 1.80E-01   | 6.39E-03 | 4.87E-01 | 6.54E-02   | 6.68E-03 | BRCA        |
|----------------|-----------|----------|------------|----------|------------|----------|----------|------------|----------|-------------|
| cg0630<br>1139 | -6.64E-02 | 1.41E-02 | 4.47E-06*  | 8.41E-01 | 1.53E-01   | 5.45E-03 | 9.10E-01 | 2.70E-02   | 2.75E-03 | BRCA        |
| cg2671<br>2096 | -1.91E-01 | 2.06E-02 | 7.82E-18*  | 7.29E-01 | 2.21E-01   | 7.86E-03 | 9.26E-01 | 1.59E-02   | 1.62E-03 | BRCA        |
| Probe          | Mean Diff | Se Diff  | KR_p-value | Mean TP  | SD mean TP | SEM TP   | Mean NT  | SD mean NT | SEM NT   | Tumour Type |
| cg1779<br>0129 | -9.19E-02 | 2.06E-02 | 1.94E-05*  | 8.30E-01 | 1.54E-01   | 7.62E-03 | 9.15E-01 | 2.38E-02   | 3.55E-03 | CRC         |
| cg1420<br>5998 | -1.25E-01 | 2.09E-02 | 4.13E-08*  | 8.00E-01 | 1.74E-01   | 8.60E-03 | 9.28E-01 | 2.46E-02   | 3.66E-03 | CRC         |
| cg0431<br>7854 | -4.26E-02 | 1.59E-02 | 9.06E-03*  | 7.92E-01 | 1.21E-01   | 5.97E-03 | 8.43E-01 | 4.75E-02   | 7.08E-03 | CRC         |
| cg1292<br>2093 | -1.78E-01 | 2.04E-02 | 1.18E-13*  | 6.68E-01 | 1.80E-01   | 8.90E-03 | 8.41E-01 | 3.21E-02   | 4.79E-03 | CRC         |
| cg1756<br>9154 | -8.54E-02 | 2.61E-02 | 1.48E-03*  | 5.54E-01 | 1.89E-01   | 9.32E-03 | 6.32E-01 | 1.03E-01   | 1.54E-02 | CRC         |
| cg1926<br>0663 | -9.71E-02 | 2.00E-02 | 3.82E-06*  | 8.02E-01 | 1.51E-01   | 7.47E-03 | 9.00E-01 | 2.84E-02   | 4.23E-03 | CRC         |
| cg0933<br>3471 | 1.84E-01  | 2.33E-02 | 2.74E-12*  | 4.83E-01 | 1.90E-01   | 9.39E-03 | 3.09E-01 | 4.27E-02   | 6.36E-03 | CRC         |
| cg0047<br>3134 | 2.35E-01  | 2.22E-02 | 1.01E-17*  | 3.33E-01 | 1.95E-01   | 9.62E-03 | 1.15E-01 | 2.73E-02   | 4.07E-03 | CRC         |
| cg0399<br>5857 | 3.93E-01  | 2.72E-02 | 1.71E-25*  | 4.97E-01 | 2.41E-01   | 1.19E-02 | 1.40E-01 | 4.51E-02   | 6.73E-03 | CRC         |
| cg0732<br>0646 | 3.46E-01  | 3.98E-02 | 6.49E-15*  | 3.68E-01 | 2.94E-01   | 1.45E-02 | 2.41E-02 | 9.54E-03   | 1.42E-03 | CRC         |
| cg0729<br>3520 | 2.46E-01  | 2.97E-02 | 4.73E-13*  | 2.77E-01 | 2.46E-01   | 1.21E-02 | 2.72E-02 | 4.87E-03   | 7.26E-04 | CRC         |
| cg0477<br>0504 | 2.94E-01  | 2.50E-02 | 6.59E-22*  | 3.18E-01 | 1.94E-01   | 9.58E-03 | 2.10E-02 | 3.77E-03   | 5.62E-04 | CRC         |
| cg2480<br>5239 | 3.09E-01  | 2.80E-02 | 7.87E-20*  | 3.97E-01 | 2.22E-01   | 1.10E-02 | 8.64E-02 | 1.85E-02   | 2.75E-03 | CRC         |
| cg0173<br>3570 | 1.11E-01  | 2.81E-02 | 1.34E-04*  | 5.92E-01 | 2.09E-01   | 1.03E-02 | 4.82E-01 | 4.51E-02   | 6.73E-03 | CRC         |
| cg2572<br>3149 | 1.08E-01  | 2.62E-02 | 8.02E-05*  | 6.31E-01 | 1.99E-01   | 9.82E-03 | 5.27E-01 | 4.88E-02   | 7.27E-03 | CRC         |
| cg2280<br>4000 | 1.08E-01  | 2.58E-02 | 5.79E-05*  | 5.66E-01 | 1.95E-01   | 9.63E-03 | 4.57E-01 | 4.30E-02   | 6.41E-03 | CRC         |
| cg0750<br>4598 | 1.09E-01  | 2.16E-02 | 2.13E-06*  | 6.76E-01 | 1.73E-01   | 8.56E-03 | 5.66E-01 | 4.64E-02   | 6.92E-03 | CRC         |
| cg1503<br>7663 | 6.53E-02  | 2.47E-02 | 9.59E-03*  | 6.26E-01 | 1.72E-01   | 8.50E-03 | 5.57E-01 | 5.67E-02   | 8.45E-03 | CRC         |
| cg1970<br>6795 | 7.06E-02  | 1.97E-02 | 4.67E-04*  | 7.11E-01 | 1.34E-01   | 6.64E-03 | 6.38E-01 | 6.08E-02   | 9.07E-03 | CRC         |
| cg2076<br>4575 | 2.88E-02  | 1.38E-02 | 4.00E-02*  | 8.04E-01 | 9.26E-02   | 4.57E-03 | 7.75E-01 | 3.61E-02   | 5.38E-03 | CRC         |

| cg0630-1139 | -9.22E-02 | 1.67E-02 | 3.30E-07*  | 8.04E-01 | 1.46E-01   | 7.19E-03 | 9.02E-01 | 3.36E-02   | 5.02E-03 | CRC         |
|-------------|-----------|----------|------------|----------|------------|----------|----------|------------|----------|-------------|
| cg2671-2096 | -1.23E-01 | 2.76E-02 | 1.93E-05*  | 4.60E-01 | 2.01E-01   | 9.92E-03 | 5.72E-01 | 1.11E-01   | 1.65E-02 | CRC         |
| Probe       | Mean Diff | Se Diff  | KR_p-value | Mean TP  | SD mean TP | SEM TP   | Mean NT  | SD mean NT | SEM NT   | Tumour Type |
| cg1779-0129 | 3.07E-02  | 3.81E-02 | 4.46E-01   | 8.01E-01 | 1.53E-01   | 1.13E-02 | 7.48E-01 | 1.09E-01   | 2.72E-02 | ESCA        |
| cg1420-5998 | -2.12E-02 | 2.39E-02 | 3.97E-01   | 8.69E-01 | 1.22E-01   | 8.95E-03 | 8.64E-01 | 1.67E-01   | 4.17E-02 | ESCA        |
| cg0431-7854 | 1.02E-01  | 3.13E-02 | 2.42E-03*  | 7.96E-01 | 1.23E-01   | 9.04E-03 | 6.94E-01 | 7.79E-02   | 1.95E-02 | ESCA        |
| cg1292-2093 | -5.78E-02 | 2.89E-02 | 6.24E-02   | 7.84E-01 | 1.32E-01   | 9.70E-03 | 8.16E-01 | 1.07E-01   | 2.67E-02 | ESCA        |
| cg1756-9154 | -1.03E-01 | 5.63E-02 | 8.57E-02   | 6.94E-01 | 2.28E-01   | 1.68E-02 | 7.51E-01 | 2.28E-01   | 5.71E-02 | ESCA        |
| cg1926-0663 | -7.89E-02 | 2.63E-02 | 7.16E-03*  | 8.23E-01 | 1.29E-01   | 9.51E-03 | 8.75E-01 | 6.19E-02   | 1.55E-02 | ESCA        |
| cg0933-3471 | 1.35E-01  | 4.75E-02 | 1.01E-02*  | 3.26E-01 | 2.25E-01   | 1.65E-02 | 2.77E-01 | 1.77E-01   | 4.43E-02 | ESCA        |
| cg0047-3134 | 1.57E-01  | 5.09E-02 | 5.22E-03*  | 2.18E-01 | 2.25E-01   | 1.65E-02 | 1.07E-01 | 9.73E-02   | 2.43E-02 | ESCA        |
| cg0399-5857 | 2.25E-01  | 6.57E-02 | 2.20E-03*  | 3.02E-01 | 2.94E-01   | 2.16E-02 | 1.70E-01 | 2.22E-01   | 5.55E-02 | ESCA        |
| cg0732-0646 | 2.35E-01  | 7.70E-02 | 5.19E-03*  | 2.72E-01 | 3.23E-01   | 2.38E-02 | 1.09E-01 | 2.39E-01   | 5.99E-02 | ESCA        |
| cg0729-3520 | 2.18E-01  | 6.45E-02 | 2.28E-03*  | 2.42E-01 | 2.78E-01   | 2.05E-02 | 8.79E-02 | 1.75E-01   | 4.38E-02 | ESCA        |
| cg0477-0504 | 1.52E-01  | 5.38E-02 | 9.37E-03*  | 1.93E-01 | 2.23E-01   | 1.64E-02 | 8.36E-02 | 1.75E-01   | 4.38E-02 | ESCA        |
| cg2480-5239 | 1.78E-01  | 5.83E-02 | 5.43E-03*  | 2.50E-01 | 2.52E-01   | 1.86E-02 | 1.41E-01 | 1.86E-01   | 4.64E-02 | ESCA        |
| cg0173-3570 | 7.08E-02  | 5.09E-02 | 1.88E-01   | 5.04E-01 | 2.37E-01   | 1.74E-02 | 4.85E-01 | 1.29E-01   | 3.24E-02 | ESCA        |
| cg2572-3149 | 2.67E-02  | 5.05E-02 | 6.11E-01   | 4.44E-01 | 2.59E-01   | 1.90E-02 | 5.01E-01 | 1.65E-01   | 4.13E-02 | ESCA        |
| cg2280-4000 | 5.19E-03  | 4.71E-02 | 9.16E-01   | 4.19E-01 | 2.33E-01   | 1.71E-02 | 4.92E-01 | 1.43E-01   | 3.57E-02 | ESCA        |
| cg0750-4598 | 8.76E-02  | 3.40E-02 | 1.96E-02*  | 5.73E-01 | 1.93E-01   | 1.42E-02 | 5.56E-01 | 1.66E-01   | 4.15E-02 | ESCA        |
| cg1503-7663 | 2.22E-02  | 3.42E-02 | 5.34E-01   | 6.27E-01 | 1.75E-01   | 1.29E-02 | 6.26E-01 | 1.31E-01   | 3.26E-02 | ESCA        |
| cg1970-6795 | 1.79E-02  | 2.93E-02 | 5.58E-01   | 7.21E-01 | 1.47E-01   | 1.08E-02 | 7.12E-01 | 1.41E-01   | 3.52E-02 | ESCA        |
| cg2076-4575 | 2.72E-02  | 2.98E-02 | 3.81E-01   | 7.05E-01 | 1.60E-01   | 1.18E-02 | 7.13E-01 | 1.73E-01   | 4.32E-02 | ESCA        |
| cg0630-1139 | -4.62E-02 | 1.51E-02 | 7.13E-03*  | 8.83E-01 | 1.00E-01   | 7.38E-03 | 8.94E-01 | 1.26E-01   | 3.16E-02 | ESCA        |

|                        |                  |                |                   |                |                   |               |                |                   |               |                    |
|------------------------|------------------|----------------|-------------------|----------------|-------------------|---------------|----------------|-------------------|---------------|--------------------|
| <b>cg2671<br/>2096</b> | -4.39E-02        | 4.87E-02       | 3.95E-01          | 7.94E-01       | 1.85E-01          | 1.36E-02      | 8.24E-01       | 2.32E-01          | 5.81E-02      | ESCA               |
| <b>Probe</b>           | <b>Mean Diff</b> | <b>Se Diff</b> | <b>KR_p-value</b> | <b>Mean TP</b> | <b>SD mean TP</b> | <b>SEM TP</b> | <b>Mean NT</b> | <b>SD mean NT</b> | <b>SEM NT</b> | <b>Tumour Type</b> |
| <b>cg1779<br/>0129</b> | -1.20E-03        | 1.06E-02       | 9.12E-01          | 8.89E-01       | 7.96E-02          | 3.46E-03      | 8.89E-01       | 4.39E-02          | 6.21E-03      | HNSC               |
| <b>cg1420<br/>5998</b> | -9.46E-03        | 4.39E-03       | 3.57E-02*         | 9.18E-01       | 4.57E-02          | 1.99E-03      | 9.33E-01       | 1.37E-02          | 1.94E-03      | HNSC               |
| <b>cg0431<br/>7854</b> | 8.57E-02         | 1.27E-02       | 7.40E-11*         | 8.22E-01       | 8.71E-02          | 3.79E-03      | 7.37E-01       | 6.68E-02          | 9.45E-03      | HNSC               |
| <b>cg1292<br/>2093</b> | -3.79E-02        | 9.97E-03       | 2.91E-04*         | 8.27E-01       | 8.51E-02          | 3.70E-03      | 8.70E-01       | 3.91E-02          | 5.53E-03      | HNSC               |
| <b>cg1756<br/>9154</b> | -2.04E-01        | 2.55E-02       | 4.14E-14*         | 7.18E-01       | 1.82E-01          | 7.91E-03      | 9.20E-01       | 3.23E-02          | 4.56E-03      | HNSC               |
| <b>cg1926<br/>0663</b> | 3.53E-03         | 6.02E-03       | 5.63E-01          | 9.03E-01       | 5.60E-02          | 2.44E-03      | 9.03E-01       | 3.21E-02          | 4.54E-03      | HNSC               |
| <b>cg0933<br/>3471</b> | -8.10E-03        | 1.16E-02       | 4.94E-01          | 1.84E-01       | 8.13E-02          | 3.54E-03      | 1.92E-01       | 4.19E-02          | 5.92E-03      | HNSC               |
| <b>cg0047<br/>3134</b> | -1.12E-02        | 3.95E-03       | 5.94E-03*         | 6.47E-02       | 3.33E-02          | 1.45E-03      | 7.65E-02       | 1.67E-02          | 2.37E-03      | HNSC               |
| <b>cg0399<br/>5857</b> | -7.61E-03        | 2.66E-03       | 6.11E-03*         | 7.85E-02       | 3.54E-02          | 1.54E-03      | 8.52E-02       | 1.64E-02          | 2.32E-03      | HNSC               |
| <b>cg0732<br/>0646</b> | -2.07E-04        | 6.50E-04       | 7.52E-01          | 2.45E-02       | 4.07E-02          | 1.77E-03      | 2.11E-02       | 3.50E-03          | 4.95E-04      | HNSC               |
| <b>cg0729<br/>3520</b> | -3.06E-03        | 1.37E-03       | 3.02E-02*         | 2.92E-02       | 3.91E-02          | 1.70E-03      | 2.91E-02       | 9.08E-03          | 1.28E-03      | HNSC               |
| <b>cg0477<br/>0504</b> | 3.14E-03         | 2.49E-03       | 2.13E-01          | 2.33E-02       | 3.60E-02          | 1.57E-03      | 1.74E-02       | 2.53E-03          | 3.58E-04      | HNSC               |
| <b>cg2480<br/>5239</b> | -1.28E-03        | 6.01E-03       | 8.34E-01          | 6.53E-02       | 4.21E-02          | 1.83E-03      | 6.66E-02       | 1.73E-02          | 2.44E-03      | HNSC               |
| <b>cg0173<br/>3570</b> | -1.51E-02        | 2.15E-02       | 4.91E-01          | 3.45E-01       | 1.46E-01          | 6.37E-03      | 3.60E-01       | 1.35E-01          | 1.90E-02      | HNSC               |
| <b>cg2572<br/>3149</b> | 4.25E-03         | 1.93E-02       | 8.29E-01          | 2.75E-01       | 1.32E-01          | 5.75E-03      | 2.71E-01       | 1.16E-01          | 1.64E-02      | HNSC               |
| <b>cg2280<br/>4000</b> | 5.29E-03         | 1.87E-02       | 7.81E-01          | 2.60E-01       | 1.27E-01          | 5.52E-03      | 2.54E-01       | 1.20E-01          | 1.69E-02      | HNSC               |
| <b>cg0750<br/>4598</b> | 1.33E-01         | 2.52E-02       | 3.49E-07*         | 4.79E-01       | 1.77E-01          | 7.68E-03      | 3.47E-01       | 1.30E-01          | 1.84E-02      | HNSC               |
| <b>cg1503<br/>7663</b> | 1.44E-01         | 2.64E-02       | 1.30E-07*         | 5.62E-01       | 1.83E-01          | 7.97E-03      | 4.18E-01       | 1.20E-01          | 1.70E-02      | HNSC               |
| <b>cg1970<br/>6795</b> | 1.63E-01         | 2.55E-02       | 6.45E-10*         | 6.66E-01       | 1.75E-01          | 7.62E-03      | 5.03E-01       | 1.39E-01          | 1.97E-02      | HNSC               |
| <b>cg2076<br/>4575</b> | 1.76E-01         | 2.74E-02       | 6.98E-10*         | 6.20E-01       | 1.89E-01          | 8.23E-03      | 4.45E-01       | 1.51E-01          | 2.13E-02      | HNSC               |
| <b>cg0630<br/>1139</b> | -4.67E-02        | 2.02E-02       | 2.37E-02*         | 8.66E-01       | 1.60E-01          | 6.97E-03      | 9.20E-01       | 1.87E-02          | 2.65E-03      | HNSC               |
| <b>Probe</b>           | <b>Mean Diff</b> | <b>Se Diff</b> | <b>KR_p-value</b> | <b>Mean TP</b> | <b>SD mean TP</b> | <b>SEM TP</b> | <b>Mean NT</b> | <b>SD mean NT</b> | <b>SEM NT</b> | <b>Tumour Type</b> |

|                        |                  |                |                   |                |                   |               |                |                   |               |                    |
|------------------------|------------------|----------------|-------------------|----------------|-------------------|---------------|----------------|-------------------|---------------|--------------------|
| <b>cg1779<br/>0129</b> | -8.43E-04        | 5.48E-03       | 8.78E-01          | 9.12E-01       | 6.85E-02          | 3.80E-03      | 9.13E-01       | 2.03E-02          | 1.61E-03      | KIRC               |
| <b>cg1420<br/>5998</b> | -1.37E-03        | 1.55E-03       | 3.80E-01          | 9.30E-01       | 2.30E-02          | 1.28E-03      | 9.32E-01       | 2.11E-02          | 1.66E-03      | KIRC               |
| <b>cg0431<br/>7854</b> | 3.20E-02         | 1.20E-02       | 8.41E-03*         | 6.32E-01       | 1.65E-01          | 9.16E-03      | 6.09E-01       | 8.93E-02          | 7.06E-03      | KIRC               |
| <b>cg1292<br/>2093</b> | -1.74E-02        | 4.40E-03       | 1.06E-04*         | 8.77E-01       | 5.62E-02          | 3.12E-03      | 8.95E-01       | 2.50E-02          | 1.98E-03      | KIRC               |
| <b>cg1756<br/>9154</b> | -7.53E-02        | 9.36E-03       | 2.45E-14*         | 8.68E-01       | 1.19E-01          | 6.62E-03      | 9.43E-01       | 1.29E-02          | 1.02E-03      | KIRC               |
| <b>cg1926<br/>0663</b> | -1.82E-02        | 2.53E-03       | 1.03E-11*         | 9.08E-01       | 3.60E-02          | 2.00E-03      | 9.31E-01       | 1.82E-02          | 1.44E-03      | KIRC               |
| <b>cg0933<br/>3471</b> | -4.71E-03        | 5.44E-03       | 3.88E-01          | 1.68E-01       | 6.14E-02          | 3.41E-03      | 1.73E-01       | 4.83E-02          | 3.82E-03      | KIRC               |
| <b>cg0047<br/>3134</b> | -2.67E-03        | 1.48E-03       | 7.37E-02          | 5.90E-02       | 1.70E-02          | 9.46E-04      | 6.15E-02       | 1.58E-02          | 1.25E-03      | KIRC               |
| <b>cg0399<br/>5857</b> | 1.74E-03         | 1.52E-03       | 2.55E-01          | 7.13E-02       | 1.79E-02          | 9.95E-04      | 6.82E-02       | 1.54E-02          | 1.22E-03      | KIRC               |
| <b>cg0732<br/>0646</b> | 4.10E-04         | 2.50E-04       | 1.03E-01          | 1.88E-02       | 5.69E-03          | 3.16E-04      | 1.59E-02       | 2.22E-03          | 1.76E-04      | KIRC               |
| <b>cg0729<br/>3520</b> | 7.20E-04         | 4.62E-04       | 1.22E-01          | 2.44E-02       | 5.77E-03          | 3.21E-04      | 2.29E-02       | 5.42E-03          | 4.28E-04      | KIRC               |
| <b>cg0477<br/>0504</b> | 8.80E-04         | 1.01E-03       | 3.85E-01          | 1.75E-02       | 1.25E-02          | 6.95E-04      | 1.66E-02       | 3.74E-03          | 2.96E-04      | KIRC               |
| <b>cg2480<br/>5239</b> | -1.05E-02        | 2.57E-03       | 5.95E-05*         | 5.33E-02       | 2.80E-02          | 1.55E-03      | 6.39E-02       | 2.38E-02          | 1.88E-03      | KIRC               |
| <b>cg0173<br/>3570</b> | -8.66E-02        | 1.06E-02       | 1.10E-14*         | 3.79E-01       | 1.31E-01          | 7.29E-03      | 4.66E-01       | 7.40E-02          | 5.85E-03      | KIRC               |
| <b>cg2572<br/>3149</b> | 1.66E-02         | 1.13E-02       | 1.43E-01          | 3.54E-01       | 1.44E-01          | 8.00E-03      | 3.38E-01       | 6.77E-02          | 5.35E-03      | KIRC               |
| <b>cg2280<br/>4000</b> | -2.44E-02        | 1.06E-02       | 2.27E-02*         | 3.11E-01       | 1.31E-01          | 7.30E-03      | 3.36E-01       | 6.05E-02          | 4.78E-03      | KIRC               |
| <b>cg0750<br/>4598</b> | 8.74E-03         | 9.95E-03       | 3.81E-01          | 3.80E-01       | 1.30E-01          | 7.21E-03      | 3.75E-01       | 7.91E-02          | 6.25E-03      | KIRC               |
| <b>cg1503<br/>7663</b> | -1.54E-02        | 9.58E-03       | 1.09E-01          | 4.48E-01       | 1.24E-01          | 6.86E-03      | 4.64E-01       | 6.40E-02          | 5.06E-03      | KIRC               |
| <b>cg1970<br/>6795</b> | -1.71E-02        | 1.03E-02       | 9.92E-02          | 5.61E-01       | 1.35E-01          | 7.49E-03      | 5.80E-01       | 5.98E-02          | 4.73E-03      | KIRC               |
| <b>cg2076<br/>4575</b> | 2.81E-02         | 1.31E-02       | 3.31E-02*         | 6.45E-01       | 1.75E-01          | 9.72E-03      | 6.21E-01       | 6.73E-02          | 5.32E-03      | KIRC               |
| <b>cg0630<br/>1139</b> | -1.24E-02        | 3.18E-03       | 1.30E-04*         | 9.32E-01       | 4.31E-02          | 2.39E-03      | 9.44E-01       | 1.24E-02          | 9.77E-04      | KIRC               |
| <b>cg2671<br/>2096</b> | -1.20E-02        | 2.42E-03       | 1.37E-06*         | 9.30E-01       | 3.14E-02          | 1.74E-03      | 9.43E-01       | 1.66E-02          | 1.31E-03      | KIRC               |
| <b>Probe</b>           | <b>Mean Diff</b> | <b>Se Diff</b> | <b>KR_p-value</b> | <b>Mean TP</b> | <b>SD mean TP</b> | <b>SEM TP</b> | <b>Mean NT</b> | <b>SD mean NT</b> | <b>SEM NT</b> | <b>Tumour Type</b> |
| <b>cg1779<br/>0129</b> | 8.64E-03         | 9.58E-03       | 3.75E-01          | 9.17E-01       | 7.89E-02          | 4.76E-03      | 9.08E-01       | 2.28E-02          | 3.40E-03      | KIRP               |

|                        |                  |                |                   |                |                   |               |                |                   |               |                    |
|------------------------|------------------|----------------|-------------------|----------------|-------------------|---------------|----------------|-------------------|---------------|--------------------|
| <b>cg1420<br/>5998</b> | -1.05E-03        | 1.85E-03       | 5.75E-01          | 9.30E-01       | 1.91E-02          | 1.15E-03      | 9.42E-01       | 1.09E-02          | 1.63E-03      | KIRP               |
| <b>cg0431<br/>7854</b> | 2.55E-01         | 2.12E-02       | 6.11E-24*         | 8.12E-01       | 1.43E-01          | 8.62E-03      | 5.58E-01       | 8.52E-02          | 1.27E-02      | KIRP               |
| <b>cg1292<br/>2093</b> | 1.79E-02         | 6.00E-03       | 4.00E-03*         | 8.98E-01       | 4.19E-02          | 2.53E-03      | 8.79E-01       | 2.83E-02          | 4.22E-03      | KIRP               |
| <b>cg1756<br/>9154</b> | -1.38E-01        | 2.43E-02       | 3.35E-07*         | 7.68E-01       | 2.09E-01          | 1.26E-02      | 9.31E-01       | 1.81E-02          | 2.70E-03      | KIRP               |
| <b>cg1926<br/>0663</b> | -2.29E-02        | 7.71E-03       | 3.96E-03*         | 9.04E-01       | 5.23E-02          | 3.15E-03      | 9.25E-01       | 2.82E-02          | 4.20E-03      | KIRP               |
| <b>cg0933<br/>3471</b> | 2.85E-03         | 1.74E-02       | 8.72E-01          | 1.75E-01       | 1.16E-01          | 6.97E-03      | 1.72E-01       | 3.54E-02          | 5.28E-03      | KIRP               |
| <b>cg0047<br/>3134</b> | 1.05E-02         | 1.57E-02       | 5.11E-01          | 7.65E-02       | 1.05E-01          | 6.32E-03      | 6.61E-02       | 1.17E-02          | 1.75E-03      | KIRP               |
| <b>cg0399<br/>5857</b> | 1.41E-02         | 1.64E-02       | 3.99E-01          | 9.02E-02       | 1.10E-01          | 6.65E-03      | 7.69E-02       | 1.24E-02          | 1.84E-03      | KIRP               |
| <b>cg0732<br/>0646</b> | 1.24E-02         | 1.83E-02       | 5.06E-01          | 4.25E-02       | 1.20E-01          | 7.24E-03      | 3.01E-02       | 6.35E-02          | 9.47E-03      | KIRP               |
| <b>cg0729<br/>3520</b> | 1.94E-02         | 1.54E-02       | 2.17E-01          | 4.26E-02       | 1.03E-01          | 6.23E-03      | 2.32E-02       | 4.53E-03          | 6.75E-04      | KIRP               |
| <b>cg0477<br/>0504</b> | 1.42E-02         | 1.19E-02       | 2.41E-01          | 3.12E-02       | 7.95E-02          | 4.79E-03      | 1.70E-02       | 3.11E-03          | 4.63E-04      | KIRP               |
| <b>cg2480<br/>5239</b> | 6.78E-03         | 1.46E-02       | 6.48E-01          | 6.90E-02       | 9.76E-02          | 5.89E-03      | 6.22E-02       | 1.69E-02          | 2.52E-03      | KIRP               |
| <b>cg0173<br/>3570</b> | -4.55E-03        | 3.03E-02       | 8.83E-01          | 4.17E-01       | 2.02E-01          | 1.22E-02      | 4.22E-01       | 6.05E-02          | 9.02E-03      | KIRP               |
| <b>cg2572<br/>3149</b> | 4.42E-02         | 2.93E-02       | 1.39E-01          | 3.63E-01       | 1.95E-01          | 1.18E-02      | 3.19E-01       | 5.53E-02          | 8.24E-03      | KIRP               |
| <b>cg2280<br/>4000</b> | 3.40E-02         | 2.88E-02       | 2.47E-01          | 3.46E-01       | 1.92E-01          | 1.16E-02      | 3.12E-01       | 5.28E-02          | 7.88E-03      | KIRP               |
| <b>cg0750<br/>4598</b> | 5.31E-02         | 3.07E-02       | 9.06E-02          | 4.09E-01       | 2.10E-01          | 1.26E-02      | 3.67E-01       | 7.41E-02          | 1.11E-02      | KIRP               |
| <b>cg1503<br/>7663</b> | 1.26E-02         | 2.79E-02       | 6.58E-01          | 4.35E-01       | 1.93E-01          | 1.17E-02      | 4.36E-01       | 5.77E-02          | 8.60E-03      | KIRP               |
| <b>cg1970<br/>6795</b> | 6.11E-02         | 2.97E-02       | 4.43E-02*         | 6.08E-01       | 2.05E-01          | 1.24E-02      | 5.56E-01       | 5.35E-02          | 7.98E-03      | KIRP               |
| <b>cg2076<br/>4575</b> | 9.51E-02         | 2.80E-02       | 1.11E-03*         | 6.59E-01       | 2.09E-01          | 1.26E-02      | 5.84E-01       | 5.74E-02          | 8.56E-03      | KIRP               |
| <b>cg0630<br/>1139</b> | -6.05E-03        | 3.30E-03       | 7.29E-02          | 9.30E-01       | 2.21E-02          | 1.33E-03      | 9.37E-01       | 1.67E-02          | 2.49E-03      | KIRP               |
| <b>cg2671<br/>2096</b> | -8.25E-03        | 4.77E-03       | 9.15E-02          | 9.33E-01       | 4.02E-02          | 2.42E-03      | 9.49E-01       | 1.10E-02          | 1.64E-03      | KIRP               |
| <b>Probe</b>           | <b>Mean Diff</b> | <b>Se Diff</b> | <b>KR_p-value</b> | <b>Mean TP</b> | <b>SD mean TP</b> | <b>SEM TP</b> | <b>Mean NT</b> | <b>SD mean NT</b> | <b>SEM NT</b> | <b>Tumour Type</b> |
| <b>cg1779<br/>0129</b> | -2.05E-02        | 1.15E-02       | 7.99E-02          | 9.01E-01       | 8.23E-02          | 4.24E-03      | 9.23E-01       | 2.91E-02          | 4.12E-03      | LIHC               |
| <b>cg1420<br/>5998</b> | -3.17E-02        | 8.87E-03       | 4.99E-04*         | 9.01E-01       | 6.24E-02          | 3.21E-03      | 9.33E-01       | 1.47E-02          | 2.08E-03      | LIHC               |

|                   |                  |                |                   |                |                   |               |                |                   |               |                    |
|-------------------|------------------|----------------|-------------------|----------------|-------------------|---------------|----------------|-------------------|---------------|--------------------|
| <b>cg04317854</b> | -9.48E-02        | 2.48E-02       | 2.09E-04*         | 7.48E-01       | 1.78E-01          | 9.18E-03      | 8.43E-01       | 4.81E-02          | 6.80E-03      | LIHC               |
| <b>cg12922093</b> | -1.74E-01        | 2.78E-02       | 5.81E-09*         | 7.01E-01       | 2.10E-01          | 1.08E-02      | 8.64E-01       | 3.40E-02          | 4.80E-03      | LIHC               |
| <b>cg17569154</b> | -1.07E-01        | 2.43E-02       | 1.91E-05*         | 8.34E-01       | 1.72E-01          | 8.84E-03      | 9.41E-01       | 1.73E-02          | 2.44E-03      | LIHC               |
| <b>cg19260663</b> | -1.90E-01        | 3.09E-02       | 4.24E-09*         | 7.21E-01       | 2.19E-01          | 1.13E-02      | 9.10E-01       | 3.03E-02          | 4.29E-03      | LIHC               |
| <b>cg09333471</b> | -9.53E-03        | 2.82E-02       | 7.39E-01          | 3.79E-01       | 1.98E-01          | 1.02E-02      | 3.93E-01       | 9.63E-02          | 1.36E-02      | LIHC               |
| <b>cg00473134</b> | 8.23E-02         | 2.25E-02       | 3.63E-04*         | 1.60E-01       | 1.60E-01          | 8.23E-03      | 8.05E-02       | 1.74E-02          | 2.47E-03      | LIHC               |
| <b>cg03995857</b> | 8.43E-02         | 2.42E-02       | 6.60E-04*         | 1.85E-01       | 1.70E-01          | 8.76E-03      | 1.00E-01       | 4.03E-02          | 5.70E-03      | LIHC               |
| <b>cg07320646</b> | 1.45E-02         | 1.30E-02       | 2.75E-01          | 3.88E-02       | 9.20E-02          | 4.74E-03      | 2.43E-02       | 9.55E-03          | 1.35E-03      | LIHC               |
| <b>cg07293520</b> | 6.76E-03         | 6.59E-03       | 3.13E-01          | 3.10E-02       | 4.66E-02          | 2.40E-03      | 2.42E-02       | 4.17E-03          | 5.89E-04      | LIHC               |
| <b>cg04770504</b> | 1.59E-02         | 1.06E-02       | 1.41E-01          | 3.50E-02       | 7.49E-02          | 3.86E-03      | 1.91E-02       | 2.56E-03          | 3.62E-04      | LIHC               |
| <b>cg24805239</b> | 2.09E-02         | 1.35E-02       | 1.27E-01          | 7.46E-02       | 9.51E-02          | 4.90E-03      | 5.36E-02       | 1.46E-02          | 2.06E-03      | LIHC               |
| <b>cg01733570</b> | 4.03E-02         | 3.31E-02       | 2.32E-01          | 3.54E-01       | 2.32E-01          | 1.19E-02      | 3.13E-01       | 8.70E-02          | 1.23E-02      | LIHC               |
| <b>cg25723149</b> | 6.74E-02         | 3.28E-02       | 4.40E-02*         | 3.20E-01       | 2.30E-01          | 1.18E-02      | 2.53E-01       | 9.19E-02          | 1.30E-02      | LIHC               |
| <b>cg22804000</b> | 7.39E-02         | 3.20E-02       | 2.35E-02*         | 3.03E-01       | 2.24E-01          | 1.15E-02      | 2.29E-01       | 8.22E-02          | 1.16E-02      | LIHC               |
| <b>cg07504598</b> | 4.15E-02         | 3.40E-02       | 2.30E-01          | 3.85E-01       | 2.37E-01          | 1.22E-02      | 3.43E-01       | 9.71E-02          | 1.37E-02      | LIHC               |
| <b>cg15037663</b> | 3.76E-02         | 3.48E-02       | 2.88E-01          | 4.80E-01       | 2.43E-01          | 1.25E-02      | 4.43E-01       | 1.12E-01          | 1.59E-02      | LIHC               |
| <b>cg19706795</b> | 5.93E-02         | 3.30E-02       | 7.74E-02          | 5.66E-01       | 2.30E-01          | 1.18E-02      | 5.07E-01       | 1.09E-01          | 1.55E-02      | LIHC               |
| <b>cg20764575</b> | 1.21E-01         | 3.61E-02       | 1.08E-03*         | 5.61E-01       | 2.49E-01          | 1.28E-02      | 4.40E-01       | 1.47E-01          | 2.08E-02      | LIHC               |
| <b>cg06301139</b> | -9.03E-02        | 2.38E-02       | 2.20E-04*         | 8.29E-01       | 1.68E-01          | 8.65E-03      | 9.20E-01       | 2.35E-02          | 3.32E-03      | LIHC               |
| <b>cg26712096</b> | -1.14E-01        | 2.92E-02       | 1.37E-04*         | 8.20E-01       | 2.07E-01          | 1.07E-02      | 9.35E-01       | 2.02E-02          | 2.86E-03      | LIHC               |
| <b>Probe</b>      | <b>Mean Diff</b> | <b>Se Diff</b> | <b>KR_p-value</b> | <b>Mean TP</b> | <b>SD mean TP</b> | <b>SEM TP</b> | <b>Mean NT</b> | <b>SD mean NT</b> | <b>SEM NT</b> | <b>Tumour Type</b> |
| <b>cg17790129</b> | 4.53E-02         | 1.46E-02       | 2.88E-03*         | 8.23E-01       | 1.03E-01          | 4.71E-03      | 7.72E-01       | 4.27E-02          | 7.55E-03      | LUAD               |
| <b>cg14205998</b> | -6.22E-03        | 8.15E-03       | 4.51E-01          | 8.59E-01       | 8.40E-02          | 3.86E-03      | 8.84E-01       | 2.99E-02          | 5.29E-03      | LUAD               |
| <b>cg04317854</b> | 1.04E-01         | 1.70E-02       | 4.20E-08*         | 7.44E-01       | 1.17E-01          | 5.38E-03      | 6.26E-01       | 5.66E-02          | 1.00E-02      | LUAD               |



|                    |                  |                |                   |                |                   |               |                |                   |               |                    |
|--------------------|------------------|----------------|-------------------|----------------|-------------------|---------------|----------------|-------------------|---------------|--------------------|
| <b>cg1292-2093</b> | -5.40E-02        | 1.70E-02       | 2.37E-03*         | 7.28E-01       | 1.32E-01          | 6.05E-03      | 8.04E-01       | 3.86E-02          | 6.82E-03      | LUAD               |
| <b>cg1756-9154</b> | -2.50E-02        | 1.33E-02       | 6.72E-02          | 8.21E-01       | 1.02E-01          | 4.68E-03      | 8.50E-01       | 3.57E-02          | 6.31E-03      | LUAD               |
| <b>cg1926-0663</b> | -5.61E-02        | 1.37E-02       | 1.37E-04*         | 7.84E-01       | 1.15E-01          | 5.28E-03      | 8.39E-01       | 4.04E-02          | 7.14E-03      | LUAD               |
| <b>cg0933-3471</b> | 6.95E-02         | 1.93E-02       | 5.02E-04*         | 2.84E-01       | 1.15E-01          | 5.30E-03      | 2.18E-01       | 3.75E-02          | 6.63E-03      | LUAD               |
| <b>cg0047-3134</b> | 4.78E-02         | 1.82E-02       | 1.01E-02*         | 1.48E-01       | 1.05E-01          | 4.84E-03      | 1.05E-01       | 2.65E-02          | 4.68E-03      | LUAD               |
| <b>cg0399-5857</b> | 8.69E-02         | 2.28E-02       | 2.68E-04*         | 2.05E-01       | 1.46E-01          | 6.71E-03      | 1.35E-01       | 2.41E-02          | 4.25E-03      | LUAD               |
| <b>cg0732-0646</b> | 6.97E-02         | 2.29E-02       | 3.49E-03*         | 1.05E-01       | 1.63E-01          | 7.52E-03      | 4.26E-02       | 1.51E-02          | 2.67E-03      | LUAD               |
| <b>cg0729-3520</b> | 5.77E-02         | 1.96E-02       | 4.35E-03*         | 1.07E-01       | 1.25E-01          | 5.76E-03      | 5.70E-02       | 1.50E-02          | 2.65E-03      | LUAD               |
| <b>cg0477-0504</b> | 7.31E-02         | 1.96E-02       | 4.28E-04*         | 1.20E-01       | 1.48E-01          | 6.82E-03      | 3.92E-02       | 1.20E-02          | 2.13E-03      | LUAD               |
| <b>cg2480-5239</b> | 6.19E-02         | 1.93E-02       | 2.12E-03*         | 1.76E-01       | 1.36E-01          | 6.26E-03      | 1.18E-01       | 2.11E-02          | 3.73E-03      | LUAD               |
| <b>cg0173-3570</b> | -3.37E-02        | 2.09E-02       | 1.14E-01          | 4.00E-01       | 1.27E-01          | 5.86E-03      | 4.45E-01       | 5.60E-02          | 9.89E-03      | LUAD               |
| <b>cg2572-3149</b> | 3.43E-02         | 2.14E-02       | 1.18E-01          | 3.66E-01       | 1.33E-01          | 6.09E-03      | 3.42E-01       | 5.47E-02          | 9.66E-03      | LUAD               |
| <b>cg2280-4000</b> | 3.20E-02         | 2.01E-02       | 1.19E-01          | 3.42E-01       | 1.23E-01          | 5.66E-03      | 3.17E-01       | 5.48E-02          | 9.69E-03      | LUAD               |
| <b>cg0750-4598</b> | 9.85E-02         | 1.65E-02       | 8.60E-08*         | 6.18E-01       | 1.17E-01          | 5.36E-03      | 5.06E-01       | 5.21E-02          | 9.21E-03      | LUAD               |
| <b>cg1503-7663</b> | 8.46E-02         | 1.67E-02       | 2.67E-06*         | 6.77E-01       | 1.10E-01          | 5.06E-03      | 5.90E-01       | 4.82E-02          | 8.51E-03      | LUAD               |
| <b>cg1970-6795</b> | 4.04E-02         | 1.59E-02       | 1.30E-02*         | 7.52E-01       | 8.95E-02          | 4.11E-03      | 7.11E-01       | 3.76E-02          | 6.65E-03      | LUAD               |
| <b>cg2076-4575</b> | 8.99E-02         | 1.50E-02       | 8.18E-09*         | 7.40E-01       | 8.39E-02          | 3.86E-03      | 6.49E-01       | 5.86E-02          | 1.04E-02      | LUAD               |
| <b>cg0630-1139</b> | -1.24E-02        | 7.50E-03       | 1.04E-01          | 8.66E-01       | 7.25E-02          | 3.33E-03      | 8.82E-01       | 2.51E-02          | 4.44E-03      | LUAD               |
| <b>cg2671-2096</b> | -2.92E-02        | 1.36E-02       | 3.68E-02*         | 8.13E-01       | 1.20E-01          | 5.50E-03      | 8.59E-01       | 2.94E-02          | 5.20E-03      | LUAD               |
| <b>Probe</b>       | <b>Mean Diff</b> | <b>Se Diff</b> | <b>KR_p-value</b> | <b>Mean TP</b> | <b>SD mean TP</b> | <b>SEM TP</b> | <b>Mean NT</b> | <b>SD mean NT</b> | <b>SEM NT</b> | <b>Tumour Type</b> |
| <b>cg1779-0129</b> | 5.53E-02         | 1.33E-02       | 5.65E-05*         | 8.86E-01       | 8.48E-02          | 4.41E-03      | 8.31E-01       | 4.50E-02          | 6.94E-03      | LUSC               |
| <b>cg1420-5998</b> | -2.40E-02        | 6.55E-03       | 6.89E-04*         | 8.91E-01       | 8.96E-02          | 4.66E-03      | 9.36E-01       | 1.13E-02          | 1.74E-03      | LUSC               |
| <b>cg0431-7854</b> | 1.17E-01         | 1.84E-02       | 1.12E-08*         | 7.76E-01       | 1.33E-01          | 6.92E-03      | 6.66E-01       | 7.54E-02          | 1.16E-02      | LUSC               |
| <b>cg1292-2093</b> | -3.20E-02        | 1.59E-02       | 4.96E-02*         | 7.95E-01       | 1.03E-01          | 5.33E-03      | 8.27E-01       | 3.16E-02          | 4.87E-03      | LUSC               |

|                        |                  |                |                   |                |                   |               |                |                   |               |                    |
|------------------------|------------------|----------------|-------------------|----------------|-------------------|---------------|----------------|-------------------|---------------|--------------------|
| <b>cg1756<br/>9154</b> | -6.77E-02        | 2.04E-02       | 1.28E-03*         | 8.36E-01       | 1.33E-01          | 6.90E-03      | 9.04E-01       | 2.98E-02          | 4.60E-03      | LUSC               |
| <b>cg1926<br/>0663</b> | -3.45E-02        | 8.77E-03       | 2.92E-04*         | 8.63E-01       | 1.04E-01          | 5.38E-03      | 9.25E-01       | 1.71E-02          | 2.64E-03      | LUSC               |
| <b>cg0933<br/>3471</b> | 1.74E-02         | 1.27E-02       | 1.82E-01          | 1.92E-01       | 8.39E-02          | 4.36E-03      | 1.75E-01       | 3.68E-02          | 5.68E-03      | LUSC               |
| <b>cg0047<br/>3134</b> | 4.21E-03         | 6.25E-03       | 5.09E-01          | 6.70E-02       | 4.05E-02          | 2.11E-03      | 6.30E-02       | 1.32E-02          | 2.03E-03      | LUSC               |
| <b>cg0399<br/>5857</b> | 2.58E-03         | 7.32E-03       | 7.30E-01          | 8.02E-02       | 4.72E-02          | 2.46E-03      | 7.76E-02       | 1.22E-02          | 1.89E-03      | LUSC               |
| <b>cg0732<br/>0646</b> | 6.17E-03         | 6.33E-03       | 3.40E-01          | 2.44E-02       | 4.10E-02          | 2.13E-03      | 1.83E-02       | 2.75E-03          | 4.25E-04      | LUSC               |
| <b>cg0729<br/>3520</b> | 4.12E-03         | 5.70E-03       | 4.79E-01          | 2.80E-02       | 3.69E-02          | 1.92E-03      | 2.39E-02       | 5.69E-03          | 8.79E-04      | LUSC               |
| <b>cg0477<br/>0504</b> | 5.25E-03         | 5.04E-03       | 3.08E-01          | 2.27E-02       | 3.26E-02          | 1.69E-03      | 1.75E-02       | 3.11E-03          | 4.80E-04      | LUSC               |
| <b>cg2480<br/>5239</b> | -8.05E-03        | 7.24E-03       | 2.76E-01          | 7.40E-02       | 4.67E-02          | 2.43E-03      | 8.21E-02       | 1.42E-02          | 2.19E-03      | LUSC               |
| <b>cg0173<br/>3570</b> | 1.35E-02         | 2.64E-02       | 6.16E-01          | 4.45E-01       | 1.71E-01          | 8.89E-03      | 4.36E-01       | 6.42E-02          | 9.91E-03      | LUSC               |
| <b>cg2572<br/>3149</b> | 5.21E-02         | 2.48E-02       | 4.01E-02*         | 3.54E-01       | 1.60E-01          | 8.32E-03      | 3.03E-01       | 5.28E-02          | 8.15E-03      | LUSC               |
| <b>cg2280<br/>4000</b> | 5.09E-02         | 2.35E-02       | 3.46E-02*         | 3.37E-01       | 1.51E-01          | 7.86E-03      | 2.86E-01       | 5.44E-02          | 8.39E-03      | LUSC               |
| <b>cg0750<br/>4598</b> | 3.95E-02         | 2.38E-02       | 1.05E-01          | 5.29E-01       | 1.69E-01          | 8.77E-03      | 5.04E-01       | 6.18E-02          | 9.54E-03      | LUSC               |
| <b>cg1503<br/>7663</b> | 4.89E-02         | 2.32E-02       | 4.03E-02*         | 6.21E-01       | 1.77E-01          | 9.20E-03      | 6.02E-01       | 5.07E-02          | 7.83E-03      | LUSC               |
| <b>cg1970<br/>6795</b> | 1.52E-02         | 1.82E-02       | 4.11E-01          | 7.17E-01       | 1.60E-01          | 8.33E-03      | 7.26E-01       | 4.99E-02          | 7.70E-03      | LUSC               |
| <b>cg2076<br/>4575</b> | 4.12E-02         | 2.17E-02       | 6.41E-02          | 6.70E-01       | 1.71E-01          | 8.87E-03      | 6.67E-01       | 5.46E-02          | 8.42E-03      | LUSC               |
| <b>cg0630<br/>1139</b> | -2.60E-02        | 1.61E-02       | 1.15E-01          | 8.90E-01       | 1.14E-01          | 5.93E-03      | 9.20E-01       | 2.35E-02          | 3.63E-03      | LUSC               |
| <b>cg2671<br/>2096</b> | -4.66E-02        | 1.40E-02       | 1.70E-03*         | 8.56E-01       | 1.39E-01          | 7.23E-03      | 9.25E-01       | 1.68E-02          | 2.59E-03      | LUSC               |
| <b>Probe</b>           | <b>Mean Diff</b> | <b>Se Diff</b> | <b>KR_p-value</b> | <b>Mean TP</b> | <b>SD mean TP</b> | <b>SEM TP</b> | <b>Mean NT</b> | <b>SD mean NT</b> | <b>SEM NT</b> | <b>Tumour Type</b> |
| <b>cg1779<br/>0129</b> | -7.74E-02        | 3.30E-02       | 3.93E-02*         | 7.87E-01       | 1.23E-01          | 9.10E-03      | 8.88E-01       | 2.69E-02          | 8.51E-03      | PAAD               |
| <b>cg1420<br/>5998</b> | -1.09E-02        | 6.51E-03       | 1.30E-01          | 9.07E-01       | 3.23E-02          | 2.38E-03      | 9.32E-01       | 1.18E-02          | 3.73E-03      | PAAD               |
| <b>cg0431<br/>7854</b> | 6.29E-02         | 3.31E-02       | 8.46E-02          | 7.69E-01       | 1.03E-01          | 7.56E-03      | 7.06E-01       | 8.95E-02          | 2.83E-02      | PAAD               |
| <b>cg1292<br/>2093</b> | 1.23E-02         | 1.91E-02       | 5.39E-01          | 8.02E-01       | 1.13E-01          | 8.30E-03      | 8.27E-01       | 6.29E-02          | 1.99E-02      | PAAD               |
| <b>cg1756<br/>9154</b> | -9.33E-02        | 2.89E-02       | 8.15E-03*         | 7.67E-01       | 1.30E-01          | 9.62E-03      | 8.80E-01       | 4.91E-02          | 1.55E-02      | PAAD               |

|                   |                  |                |                   |                |                   |               |                |                   |               |                    |
|-------------------|------------------|----------------|-------------------|----------------|-------------------|---------------|----------------|-------------------|---------------|--------------------|
| <b>cg19260663</b> | 6.54E-03         | 8.05E-03       | 4.38E-01          | 8.44E-01       | 1.10E-01          | 8.08E-03      | 9.00E-01       | 2.76E-02          | 8.73E-03      | PAAD               |
| <b>cg09333471</b> | -3.88E-02        | 3.09E-02       | 2.49E-01          | 3.53E-01       | 1.28E-01          | 9.41E-03      | 3.78E-01       | 7.50E-02          | 2.37E-02      | PAAD               |
| <b>cg00473134</b> | 5.66E-02         | 2.95E-02       | 8.61E-02          | 1.54E-01       | 1.33E-01          | 9.84E-03      | 8.73E-02       | 7.56E-02          | 2.39E-02      | PAAD               |
| <b>cg03995857</b> | 7.30E-02         | 3.42E-02       | 6.00E-02          | 1.85E-01       | 1.60E-01          | 1.18E-02      | 1.10E-01       | 1.14E-01          | 3.60E-02      | PAAD               |
| <b>cg07320646</b> | 3.57E-05         | 7.24E-04       | 9.62E-01          | 4.93E-02       | 1.05E-01          | 7.77E-03      | 1.73E-02       | 3.78E-03          | 1.20E-03      | PAAD               |
| <b>cg07293520</b> | 1.18E-02         | 1.04E-02       | 2.89E-01          | 4.46E-02       | 7.08E-02          | 5.22E-03      | 2.14E-02       | 5.73E-03          | 1.81E-03      | PAAD               |
| <b>cg04770504</b> | 3.86E-02         | 2.46E-02       | 1.54E-01          | 7.53E-02       | 1.15E-01          | 8.47E-03      | 2.83E-02       | 3.39E-02          | 1.07E-02      | PAAD               |
| <b>cg24805239</b> | 3.78E-02         | 2.72E-02       | 2.02E-01          | 1.25E-01       | 1.21E-01          | 8.94E-03      | 6.61E-02       | 4.58E-02          | 1.45E-02      | PAAD               |
| <b>cg01733570</b> | -2.13E-01        | 3.84E-02       | 1.17E-04*         | 5.18E-01       | 1.69E-01          | 1.24E-02      | 6.97E-01       | 7.59E-02          | 2.40E-02      | PAAD               |
| <b>cg25723149</b> | -1.30E-01        | 3.07E-02       | 1.55E-03*         | 4.87E-01       | 1.65E-01          | 1.21E-02      | 5.66E-01       | 4.96E-02          | 1.57E-02      | PAAD               |
| <b>cg22804000</b> | -1.25E-01        | 3.36E-02       | 3.40E-03*         | 4.67E-01       | 1.59E-01          | 1.17E-02      | 5.63E-01       | 7.97E-02          | 2.52E-02      | PAAD               |
| <b>cg07504598</b> | 1.93E-02         | 2.96E-02       | 5.40E-01          | 6.05E-01       | 1.30E-01          | 9.58E-03      | 5.79E-01       | 6.95E-02          | 2.20E-02      | PAAD               |
| <b>cg15037663</b> | -3.38E-02        | 2.53E-02       | 2.19E-01          | 6.70E-01       | 1.16E-01          | 8.52E-03      | 7.01E-01       | 4.35E-02          | 1.37E-02      | PAAD               |
| <b>cg19706795</b> | -4.78E-02        | 1.84E-02       | 2.65E-02*         | 7.71E-01       | 8.91E-02          | 6.57E-03      | 8.15E-01       | 5.85E-02          | 1.85E-02      | PAAD               |
| <b>cg20764575</b> | -4.35E-02        | 2.88E-02       | 1.71E-01          | 7.52E-01       | 9.15E-02          | 6.74E-03      | 8.00E-01       | 7.10E-02          | 2.25E-02      | PAAD               |
| <b>cg06301139</b> | 3.96E-03         | 5.34E-03       | 4.81E-01          | 9.29E-01       | 3.82E-02          | 2.82E-03      | 9.43E-01       | 1.64E-02          | 5.19E-03      | PAAD               |
| <b>cg26712096</b> | -4.40E-03        | 9.24E-03       | 6.48E-01          | 8.94E-01       | 6.34E-02          | 4.67E-03      | 9.30E-01       | 1.34E-02          | 4.22E-03      | PAAD               |
| <b>Probe</b>      | <b>Mean Diff</b> | <b>Se Diff</b> | <b>KR_p-value</b> | <b>Mean TP</b> | <b>SD mean TP</b> | <b>SEM TP</b> | <b>Mean NT</b> | <b>SD mean NT</b> | <b>SEM NT</b> | <b>Tumour Type</b> |
| <b>cg17790129</b> | -3.15E-03        | 3.81E-03       | 4.16E-01          | 9.34E-01       | 2.60E-02          | 1.16E-03      | 9.38E-01       | 2.21E-02          | 3.12E-03      | PRAD               |
| <b>cg14205998</b> | -2.84E-03        | 2.59E-03       | 2.78E-01          | 9.26E-01       | 2.62E-02          | 1.17E-03      | 9.41E-01       | 1.18E-02          | 1.68E-03      | PRAD               |
| <b>cg04317854</b> | 3.95E-02         | 1.50E-02       | 9.88E-03*         | 7.07E-01       | 1.07E-01          | 4.76E-03      | 6.68E-01       | 8.95E-02          | 1.27E-02      | PRAD               |
| <b>cg12922093</b> | -7.26E-02        | 1.43E-02       | 1.20E-06*         | 8.33E-01       | 1.05E-01          | 4.71E-03      | 9.06E-01       | 2.70E-02          | 3.82E-03      | PRAD               |
| <b>cg17569154</b> | 1.17E-02         | 1.03E-02       | 2.67E-01          | 8.54E-01       | 8.10E-02          | 3.62E-03      | 8.41E-01       | 7.32E-02          | 1.04E-02      | PRAD               |
| <b>cg19260663</b> | -9.24E-02        | 1.82E-02       | 1.04E-06*         | 8.25E-01       | 1.31E-01          | 5.86E-03      | 9.19E-01       | 3.87E-02          | 5.48E-03      | PRAD               |

|                        |                  |                |                   |                |                   |               |                |                   |               |                    |
|------------------------|------------------|----------------|-------------------|----------------|-------------------|---------------|----------------|-------------------|---------------|--------------------|
| <b>cg0933<br/>3471</b> | 2.46E-01         | 1.98E-02       | 3.11E-30*         | 4.97E-01       | 1.37E-01          | 6.11E-03      | 2.51E-01       | 8.65E-02          | 1.22E-02      | PRAD               |
| <b>cg0047<br/>3134</b> | 1.50E-01         | 1.66E-02       | 4.32E-14*         | 2.45E-01       | 1.48E-01          | 6.59E-03      | 8.30E-02       | 4.73E-02          | 6.68E-03      | PRAD               |
| <b>cg0399<br/>5857</b> | 1.06E-01         | 1.44E-02       | 3.04E-10*         | 2.21E-01       | 1.54E-01          | 6.89E-03      | 8.87E-02       | 4.92E-02          | 6.96E-03      | PRAD               |
| <b>cg0732<br/>0646</b> | -2.53E-04        | 1.40E-03       | 8.57E-01          | 2.68E-02       | 4.47E-02          | 2.00E-03      | 2.01E-02       | 3.32E-03          | 4.69E-04      | PRAD               |
| <b>cg0729<br/>3520</b> | 5.93E-04         | 9.60E-04       | 5.39E-01          | 3.33E-02       | 4.63E-02          | 2.07E-03      | 2.64E-02       | 5.64E-03          | 7.97E-04      | PRAD               |
| <b>cg0477<br/>0504</b> | 7.17E-02         | 1.51E-02       | 8.94E-06*         | 1.05E-01       | 1.32E-01          | 5.90E-03      | 1.97E-02       | 6.60E-03          | 9.33E-04      | PRAD               |
| <b>cg2480<br/>5239</b> | 1.51E-01         | 1.77E-02       | 2.81E-13*         | 2.60E-01       | 1.52E-01          | 6.78E-03      | 1.00E-01       | 4.45E-02          | 6.29E-03      | PRAD               |
| <b>cg0173<br/>3570</b> | 1.18E-01         | 1.09E-02       | 7.86E-20*         | 7.93E-01       | 8.24E-02          | 3.68E-03      | 6.74E-01       | 8.17E-02          | 1.16E-02      | PRAD               |
| <b>cg2572<br/>3149</b> | 1.54E-01         | 1.32E-02       | 9.38E-21*         | 7.58E-01       | 1.07E-01          | 4.76E-03      | 6.00E-01       | 8.93E-02          | 1.26E-02      | PRAD               |
| <b>cg2280<br/>4000</b> | 1.55E-01         | 1.39E-02       | 5.61E-20*         | 7.42E-01       | 1.10E-01          | 4.90E-03      | 5.89E-01       | 8.33E-02          | 1.18E-02      | PRAD               |
| <b>cg0750<br/>4598</b> | 1.21E-01         | 1.39E-02       | 2.16E-15*         | 7.24E-01       | 1.01E-01          | 4.51E-03      | 6.03E-01       | 7.84E-02          | 1.11E-02      | PRAD               |
| <b>cg1503<br/>7663</b> | 7.42E-02         | 1.11E-02       | 2.00E-10*         | 7.92E-01       | 7.71E-02          | 3.44E-03      | 7.18E-01       | 7.19E-02          | 1.02E-02      | PRAD               |
| <b>cg1970<br/>6795</b> | 4.06E-02         | 7.75E-03       | 5.78E-07*         | 8.37E-01       | 5.50E-02          | 2.46E-03      | 7.97E-01       | 5.69E-02          | 8.04E-03      | PRAD               |
| <b>cg2076<br/>4575</b> | 2.98E-02         | 8.51E-03       | 6.22E-04*         | 8.26E-01       | 5.75E-02          | 2.57E-03      | 7.97E-01       | 5.66E-02          | 8.00E-03      | PRAD               |
| <b>cg0630<br/>1139</b> | -9.23E-03        | 2.36E-03       | 1.30E-04*         | 9.37E-01       | 1.62E-02          | 7.21E-04      | 9.46E-01       | 1.26E-02          | 1.79E-03      | PRAD               |
| <b>cg2671<br/>2096</b> | -7.43E-02        | 1.42E-02       | 8.08E-07*         | 8.29E-01       | 1.12E-01          | 4.98E-03      | 9.08E-01       | 4.26E-02          | 6.02E-03      | PRAD               |
| <b>Probe</b>           | <b>Mean Diff</b> | <b>Se Diff</b> | <b>KR_p-value</b> | <b>Mean TP</b> | <b>SD mean TP</b> | <b>SEM TP</b> | <b>Mean NT</b> | <b>SD mean NT</b> | <b>SEM NT</b> | <b>Tumour Type</b> |
| <b>cg1779<br/>0129</b> | 6.87E-03         | 3.82E-03       | 7.71E-02          | 9.32E-01       | 4.57E-02          | 2.03E-03      | 9.23E-01       | 5.62E-02          | 7.51E-03      | THCA               |
| <b>cg1420<br/>5998</b> | 3.58E-04         | 2.82E-03       | 9.00E-01          | 9.33E-01       | 2.09E-02          | 9.29E-04      | 9.33E-01       | 1.55E-02          | 2.07E-03      | THCA               |
| <b>cg0431<br/>7854</b> | 7.74E-02         | 1.58E-02       | 3.47E-06*         | 8.10E-01       | 1.32E-01          | 5.88E-03      | 7.33E-01       | 8.96E-02          | 1.20E-02      | THCA               |
| <b>cg1292<br/>2093</b> | 7.66E-03         | 4.19E-03       | 7.28E-02          | 9.14E-01       | 4.43E-02          | 1.97E-03      | 9.08E-01       | 3.38E-02          | 4.51E-03      | THCA               |
| <b>cg1756<br/>9154</b> | -1.17E-03        | 1.94E-03       | 5.50E-01          | 9.45E-01       | 1.63E-02          | 7.24E-04      | 9.46E-01       | 1.27E-02          | 1.70E-03      | THCA               |
| <b>cg1926<br/>0663</b> | 4.37E-03         | 4.88E-03       | 3.77E-01          | 9.22E-01       | 3.57E-02          | 1.59E-03      | 9.17E-01       | 2.25E-02          | 3.01E-03      | THCA               |
| <b>cg0933<br/>3471</b> | 3.06E-03         | 1.19E-02       | 7.99E-01          | 1.90E-01       | 9.60E-02          | 4.27E-03      | 1.89E-01       | 4.02E-02          | 5.38E-03      | THCA               |

|              |                  |                |                   |                |                   |               |                |                   |               |                    |
|--------------|------------------|----------------|-------------------|----------------|-------------------|---------------|----------------|-------------------|---------------|--------------------|
| cg0047-3134  | -2.36E-04        | 2.17E-03       | 9.14E-01          | 5.97E-02       | 2.57E-02          | 1.14E-03      | 6.11E-02       | 1.70E-02          | 2.27E-03      | THCA               |
| cg0399-5857  | -2.68E-03        | 2.07E-03       | 2.01E-01          | 7.56E-02       | 2.15E-02          | 9.57E-04      | 8.03E-02       | 1.72E-02          | 2.29E-03      | THCA               |
| cg0732-0646  | 6.10E-04         | 8.68E-04       | 4.88E-01          | 2.20E-02       | 7.09E-03          | 3.15E-04      | 2.28E-02       | 7.02E-03          | 9.38E-04      | THCA               |
| cg0729-3520  | -7.57E-04        | 7.49E-04       | 3.19E-01          | 2.52E-02       | 6.33E-03          | 2.81E-04      | 2.70E-02       | 1.04E-02          | 1.39E-03      | THCA               |
| cg0477-0504  | -8.18E-04        | 4.94E-04       | 1.04E-01          | 2.01E-02       | 1.21E-02          | 5.38E-04      | 2.06E-02       | 4.42E-03          | 5.90E-04      | THCA               |
| cg2480-5239  | 2.82E-03         | 6.64E-03       | 6.75E-01          | 8.67E-02       | 5.68E-02          | 2.52E-03      | 8.33E-02       | 1.74E-02          | 2.32E-03      | THCA               |
| cg0173-3570  | -2.16E-01        | 2.19E-02       | 1.86E-17*         | 3.47E-01       | 1.81E-01          | 8.06E-03      | 5.63E-01       | 6.50E-02          | 8.69E-03      | THCA               |
| cg2572-3149  | -5.97E-02        | 2.12E-02       | 6.06E-03*         | 3.97E-01       | 1.75E-01          | 7.80E-03      | 4.56E-01       | 6.75E-02          | 9.02E-03      | THCA               |
| cg2280-4000  | -8.32E-02        | 2.32E-02       | 4.77E-04*         | 4.01E-01       | 1.80E-01          | 7.98E-03      | 4.88E-01       | 4.87E-02          | 6.50E-03      | THCA               |
| cg0750-4598  | 6.78E-02         | 2.48E-02       | 7.45E-03*         | 5.65E-01       | 1.88E-01          | 8.36E-03      | 5.03E-01       | 9.60E-02          | 1.28E-02      | THCA               |
| cg1503-7663  | 3.09E-02         | 2.49E-02       | 2.22E-01          | 6.82E-01       | 1.85E-01          | 8.21E-03      | 6.51E-01       | 7.46E-02          | 9.96E-03      | THCA               |
| cg1970-6795  | 2.59E-02         | 1.30E-02       | 5.14E-02          | 8.35E-01       | 9.95E-02          | 4.43E-03      | 8.12E-01       | 4.31E-02          | 5.76E-03      | THCA               |
| cg2076-4575  | 4.70E-02         | 1.35E-02       | 6.29E-04*         | 8.48E-01       | 1.00E-01          | 4.44E-03      | 8.01E-01       | 4.77E-02          | 6.37E-03      | THCA               |
| cg0630-1139  | 2.24E-03         | 1.56E-03       | 1.59E-01          | 9.48E-01       | 1.13E-02          | 5.02E-04      | 9.46E-01       | 9.10E-03          | 1.22E-03      | THCA               |
| cg2671-2096  | -2.22E-04        | 4.01E-03       | 9.57E-01          | 9.39E-01       | 2.96E-02          | 1.32E-03      | 9.39E-01       | 1.65E-02          | 2.21E-03      | THCA               |
| <b>Probe</b> | <b>Mean Diff</b> | <b>Se Diff</b> | <b>KR_p-value</b> | <b>Mean TP</b> | <b>SD mean TP</b> | <b>SEM TP</b> | <b>Mean NT</b> | <b>SD mean NT</b> | <b>SEM NT</b> | <b>Tumour Type</b> |
| cg1779-0129  | -4.11E-02        | 1.72E-02       | 2.04E-02*         | 8.49E-01       | 1.41E-01          | 6.76E-03      | 8.96E-01       | 7.41E-02          | 1.09E-02      | UCEC               |
| cg1420-5998  | -1.41E-02        | 6.63E-03       | 3.71E-02*         | 9.17E-01       | 4.63E-02          | 2.21E-03      | 9.33E-01       | 3.10E-02          | 4.57E-03      | UCEC               |
| cg0431-7854  | 2.79E-02         | 2.44E-02       | 2.61E-01          | 7.63E-01       | 1.75E-01          | 8.37E-03      | 7.45E-01       | 7.15E-02          | 1.05E-02      | UCEC               |
| cg1292-2093  | -3.80E-02        | 1.46E-02       | 1.13E-02*         | 8.53E-01       | 1.02E-01          | 4.87E-03      | 8.92E-01       | 4.08E-02          | 6.01E-03      | UCEC               |
| cg1756-9154  | 1.43E-01         | 1.52E-02       | 8.46E-19*         | 8.94E-01       | 8.92E-02          | 4.26E-03      | 7.51E-01       | 1.60E-01          | 2.36E-02      | UCEC               |
| cg1926-0663  | -6.34E-02        | 1.76E-02       | 4.21E-04*         | 8.42E-01       | 1.18E-01          | 5.65E-03      | 9.06E-01       | 4.34E-02          | 6.40E-03      | UCEC               |
| cg0933-3471  | 9.62E-02         | 2.39E-02       | 1.07E-04*         | 3.32E-01       | 1.72E-01          | 8.23E-03      | 2.37E-01       | 7.82E-02          | 1.15E-02      | UCEC               |
| cg0047-3134  | 3.23E-02         | 1.41E-02       | 2.70E-02*         | 1.27E-01       | 1.42E-01          | 6.77E-03      | 8.19E-02       | 2.47E-02          | 3.64E-03      | UCEC               |

|                |           |          |           |          |          |          |          |          |          |      |
|----------------|-----------|----------|-----------|----------|----------|----------|----------|----------|----------|------|
| cg0399<br>5857 | 1.82E-02  | 1.01E-02 | 7.78E-02  | 1.44E-01 | 1.71E-01 | 8.15E-03 | 9.17E-02 | 2.23E-02 | 3.29E-03 | UCEC |
| cg0732<br>0646 | -6.43E-05 | 2.71E-03 | 9.81E-01  | 6.51E-02 | 1.55E-01 | 7.41E-03 | 2.84E-02 | 1.04E-02 | 1.54E-03 | UCEC |
| cg0729<br>3520 | -7.86E-04 | 3.46E-03 | 8.22E-01  | 6.05E-02 | 1.34E-01 | 6.40E-03 | 2.81E-02 | 6.46E-03 | 9.52E-04 | UCEC |
| cg0477<br>0504 | 1.99E-02  | 8.87E-03 | 3.04E-02* | 7.00E-02 | 1.41E-01 | 6.73E-03 | 2.01E-02 | 3.06E-03 | 4.51E-04 | UCEC |
| cg2480<br>5239 | 2.91E-02  | 1.59E-02 | 7.40E-02  | 1.18E-01 | 1.55E-01 | 7.42E-03 | 7.00E-02 | 2.61E-02 | 3.86E-03 | UCEC |
| cg0173<br>3570 | -7.69E-02 | 3.23E-02 | 1.98E-02* | 4.95E-01 | 2.25E-01 | 1.08E-02 | 5.69E-01 | 1.06E-01 | 1.56E-02 | UCEC |
| cg2572<br>3149 | -6.37E-02 | 3.15E-02 | 4.80E-02* | 4.01E-01 | 2.26E-01 | 1.08E-02 | 4.61E-01 | 8.97E-02 | 1.32E-02 | UCEC |
| cg2280<br>4000 | -8.24E-02 | 2.94E-02 | 6.50E-03* | 3.95E-01 | 2.15E-01 | 1.03E-02 | 4.73E-01 | 8.66E-02 | 1.28E-02 | UCEC |
| cg0750<br>4598 | -8.50E-02 | 2.88E-02 | 4.16E-03* | 3.94E-01 | 2.05E-01 | 9.82E-03 | 4.76E-01 | 9.38E-02 | 1.38E-02 | UCEC |
| cg1503<br>7663 | -1.23E-01 | 2.84E-02 | 3.42E-05* | 4.45E-01 | 2.06E-01 | 9.83E-03 | 5.61E-01 | 9.34E-02 | 1.38E-02 | UCEC |
| cg1970<br>6795 | -8.73E-02 | 2.75E-02 | 2.13E-03* | 5.65E-01 | 2.02E-01 | 9.65E-03 | 6.55E-01 | 8.46E-02 | 1.25E-02 | UCEC |
| cg2076<br>4575 | -1.42E-01 | 3.01E-02 | 8.79E-06* | 5.47E-01 | 2.31E-01 | 1.10E-02 | 6.95E-01 | 8.30E-02 | 1.22E-02 | UCEC |
| cg0630<br>1139 | -5.89E-02 | 1.39E-02 | 5.83E-05* | 8.80E-01 | 1.07E-01 | 5.13E-03 | 9.45E-01 | 9.68E-03 | 1.43E-03 | UCEC |
| cg2671<br>2096 | -9.27E-02 | 2.27E-02 | 6.61E-05* | 8.41E-01 | 1.54E-01 | 7.34E-03 | 9.34E-01 | 1.86E-02 | 2.74E-03 | UCEC |

TP = primary tumour, NT = normal tissue, Mean diff = difference in means (mean NT – mean TP), SE = standard error of difference of means, SD = standard deviation, SEM = standard error of the mean. \* represents significant results for which p-value < 0.05. Light shaded rows represent intragenic CpGs while dark shaded rows represent putative promoter CpGs.

**Table S2.** Table of the individual dataset analysis AUC values that satisfy the specified thresholds (minimum average AUC = 0.84 and minimum AUC threshold = 0.80). NA values are tumour types for which the probe combination did not meet the AUC thresholds.

| Probe Combination                    | BL<br>CA | BR<br>CA | C<br>R<br>C | ES<br>CA | HN<br>SC | KI<br>RC | KI<br>RP | LI<br>H<br>C | LU<br>AD | LU<br>SC | PA<br>AD | PR<br>AD | TH<br>CA | UC<br>EC |
|--------------------------------------|----------|----------|-------------|----------|----------|----------|----------|--------------|----------|----------|----------|----------|----------|----------|
| cg00473134+cg04317<br>854+cg17569154 | N<br>A   | 0.8<br>6 | 0.<br>86    | N<br>A   | 0.9<br>6 | 0.8<br>0 | 0.9<br>4 | 0.8<br>9     | 0.8<br>9 | 0.9<br>0 | NA       | 0.9<br>0 | NA       | N<br>A   |
| cg00473134+cg04317<br>854+cg19260663 | 0.9<br>0 | 0.9<br>1 | 0.<br>91    | 0.8<br>3 | 0.8<br>2 | N<br>A   | 0.9<br>1 | 0.8<br>9     | 0.9<br>2 | 0.9<br>2 | NA       | 0.9<br>3 | NA       | N<br>A   |
| cg00473134+cg04317<br>854+cg26712096 | 0.8<br>4 | 0.9<br>1 | 0.<br>88    | N<br>A   | 0.8<br>9 | N<br>A   | 0.9<br>3 | 0.8<br>3     | 0.9<br>2 | 0.9<br>2 | 0.8<br>1 | 0.9<br>3 | NA       | 0.8<br>1 |
| cg01733570+cg04317<br>854+cg06301139 | N<br>A   | 0.8<br>3 | 0.<br>85    | N<br>A   | 0.8<br>5 | N<br>A   | 0.9<br>1 | N<br>A       | 0.8<br>9 | 0.8<br>7 | 0.8<br>4 | 0.8<br>9 | 0.8<br>8 | 0.8<br>4 |
| cg01733570+cg04317<br>854+cg12922093 | N<br>A   | 0.8<br>8 | 0.<br>86    | 0.8<br>2 | 0.8<br>7 | 0.8<br>1 | 0.9<br>2 | N<br>A       | 0.9<br>2 | 0.8<br>6 | 0.8<br>2 | 0.9<br>0 | 0.8<br>8 | N<br>A   |

|                                      |          |          |          |          |          |          |          |          |          |          |          |          |          |          |
|--------------------------------------|----------|----------|----------|----------|----------|----------|----------|----------|----------|----------|----------|----------|----------|----------|
| cg01733570+cg04317<br>854+cg14205998 | 0.8<br>6 | 0.8<br>5 | 0.<br>88 | 0.8<br>1 | 0.8<br>4 | N<br>A   | 0.9<br>2 | N<br>A   | 0.8<br>8 | 0.9<br>3 | 0.8<br>9 | 0.8<br>6 | 0.8<br>7 | N<br>A   |
| cg01733570+cg04317<br>854+cg17569154 | N<br>A   | 0.8<br>6 | N<br>A   | 0.8<br>1 | 0.9<br>6 | 0.8<br>7 | 0.9<br>3 | 0.8<br>6 | 0.8<br>9 | 0.9<br>0 | 0.8<br>3 | 0.8<br>4 | 0.8<br>8 | 0.8<br>1 |
| cg01733570+cg04317<br>854+cg19260663 | 0.9<br>0 | 0.9<br>1 | 0.<br>84 | 0.8<br>9 | NA       | 0.8<br>1 | 0.9<br>1 | 0.8<br>6 | 0.9<br>2 | 0.9<br>2 | 0.9<br>0 | 0.8<br>9 | 0.8<br>7 | N<br>A   |
| cg01733570+cg04317<br>854+cg26712096 | 0.8<br>5 | 0.9<br>0 | N<br>A   | N<br>A   | 0.8<br>9 | N<br>A   | 0.9<br>3 | N<br>A   | 0.9<br>2 | 0.9<br>2 | 0.8<br>7 | 0.8<br>8 | 0.8<br>8 | 0.8<br>2 |
| cg01733570+cg04770<br>504+cg17569154 | N<br>A   | 0.8<br>7 | 0.<br>96 | N<br>A   | 0.9<br>2 | 0.8<br>6 | 0.8<br>1 | 0.8<br>6 | 0.8<br>1 | N<br>A   | 0.8<br>8 | 0.8<br>9 | 0.8<br>6 | 0.8<br>8 |
| cg01733570+cg17569<br>154+cg19260663 | 0.8<br>9 | 0.9<br>1 | 0.<br>83 | N<br>A   | 0.9<br>2 | 0.8<br>9 | 0.8<br>6 | 0.9<br>1 | NA       | 0.8<br>4 | 0.9<br>3 | 0.8<br>8 | 0.8<br>6 | 0.9<br>3 |
| cg03995857+cg04317<br>854+cg17569154 | N<br>A   | 0.8<br>5 | 0.<br>90 | 0.8<br>2 | 0.9<br>6 | N<br>A   | 0.9<br>3 | 0.8<br>8 | 0.9<br>0 | 0.9<br>0 | NA       | 0.8<br>5 | NA       | N<br>A   |
| cg03995857+cg04317<br>854+cg19260663 | 0.8<br>9 | 0.9<br>0 | 0.<br>92 | 0.8<br>6 | NA       | N<br>A   | 0.9<br>1 | 0.8<br>8 | 0.9<br>3 | 0.9<br>2 | NA       | 0.9<br>0 | NA       | N<br>A   |
| cg04317854+cg04770<br>504+cg17569154 | N<br>A   | 0.8<br>4 | 0.<br>92 | 0.8<br>4 | 0.9<br>6 | 0.8<br>0 | 0.9<br>4 | 0.8<br>5 | 0.9<br>3 | 0.8<br>9 | NA       | 0.8<br>4 | NA       | 0.8<br>1 |
| cg04317854+cg04770<br>504+cg19260663 | 0.9<br>1 | 0.9<br>0 | 0.<br>94 | N<br>A   | 0.8<br>1 | N<br>A   | 0.9<br>1 | 0.8<br>7 | 0.9<br>2 | 0.9<br>2 | NA       | 0.8<br>7 | NA       | N<br>A   |
| cg04317854+cg04770<br>504+cg26712096 | 0.8<br>6 | 0.8<br>9 | 0.<br>92 | 0.8<br>4 | 0.9<br>1 | N<br>A   | 0.9<br>3 | 0.8<br>0 | 0.9<br>2 | 0.9<br>2 | NA       | 0.9<br>0 | NA       | 0.8<br>3 |
| cg04317854+cg07293<br>520+cg19260663 | 0.8<br>9 | 0.8<br>8 | 0.<br>92 | 0.8<br>5 | NA       | N<br>A   | 0.9<br>2 | 0.8<br>7 | 0.9<br>2 | 0.9<br>2 | 0.8<br>3 | 0.8<br>0 | NA       | N<br>A   |
| cg04317854+cg07320<br>646+cg19260663 | 0.9<br>0 | 0.8<br>8 | 0.<br>92 | 0.8<br>6 | NA       | N<br>A   | 0.9<br>2 | 0.8<br>7 | 0.9<br>1 | 0.9<br>3 | 0.8<br>6 | 0.8<br>2 | NA       | N<br>A   |
| cg04317854+cg07320<br>646+cg26712096 | 0.8<br>6 | 0.8<br>6 | 0.<br>90 | 0.8<br>1 | 0.8<br>9 | N<br>A   | 0.9<br>3 | N<br>A   | 0.9<br>2 | 0.9<br>3 | 0.8<br>4 | 0.8<br>2 | NA       | 0.8<br>2 |
| cg04317854+cg07504<br>598+cg19260663 | 0.9<br>2 | 0.9<br>3 | 0.<br>88 | 0.8<br>3 | 0.8<br>4 | N<br>A   | 0.9<br>2 | 0.8<br>7 | 0.9<br>3 | 0.9<br>3 | NA       | 0.8<br>7 | NA       | N<br>A   |
| cg04317854+cg07504<br>598+cg26712096 | 0.9<br>1 | 0.9<br>4 | 0.<br>83 | N<br>A   | 0.9<br>2 | N<br>A   | 0.9<br>4 | 0.8<br>2 | 0.9<br>4 | 0.9<br>1 | 0.8<br>2 | 0.8<br>7 | NA       | 0.8<br>0 |
| cg04317854+cg09333<br>471+cg17569154 | N<br>A   | 0.9<br>1 | 0.<br>84 | N<br>A   | 0.9<br>6 | 0.8<br>0 | 0.9<br>4 | 0.8<br>5 | 0.9<br>1 | 0.9<br>0 | 0.8<br>1 | 0.9<br>3 | NA       | N<br>A   |
| cg04317854+cg09333<br>471+cg19260663 | 0.9<br>1 | 0.9<br>3 | 0.<br>89 | 0.8<br>8 | NA       | N<br>A   | 0.9<br>3 | 0.8<br>6 | 0.9<br>2 | 0.9<br>3 | NA       | 0.9<br>3 | NA       | N<br>A   |
| cg04317854+cg09333<br>471+cg26712096 | 0.8<br>3 | 0.9<br>4 | 0.<br>84 | N<br>A   | 0.9<br>0 | N<br>A   | 0.9<br>3 | N<br>A   | 0.9<br>2 | 0.9<br>1 | 0.8<br>0 | 0.9<br>3 | NA       | 0.8<br>4 |
| cg04317854+cg12922<br>093+cg17569154 | 0.8<br>3 | 0.8<br>3 | N<br>A   | 0.8<br>1 | 0.9<br>6 | 0.8<br>0 | 0.9<br>5 | 0.8<br>5 | 0.9<br>3 | 0.9<br>1 | NA       | 0.8<br>1 | NA       | 0.8<br>3 |
| cg04317854+cg12922<br>093+cg19260663 | 0.9<br>0 | 0.8<br>7 | 0.<br>83 | 0.8<br>6 | 0.8<br>8 | N<br>A   | 0.9<br>0 | 0.8<br>5 | 0.9<br>2 | 0.9<br>3 | NA       | 0.8<br>5 | NA       | N<br>A   |
| cg04317854+cg14205<br>998+cg17569154 | 0.8<br>9 | NA       | 0.<br>80 | N<br>A   | 0.9<br>6 | N<br>A   | 0.9<br>5 | 0.8<br>8 | 0.9<br>0 | 0.9<br>4 | 0.8<br>7 | NA       | NA       | 0.8<br>2 |
| cg04317854+cg14205<br>998+cg19260663 | 0.9<br>0 | 0.8<br>6 | 0.<br>84 | 0.8<br>4 | 0.8<br>5 | N<br>A   | 0.9<br>2 | 0.8<br>6 | 0.9<br>2 | 0.9<br>5 | 0.8<br>2 | 0.8<br>4 | NA       | N<br>A   |
| cg04317854+cg15037<br>663+cg19260663 | 0.9<br>1 | 0.9<br>2 | 0.<br>83 | 0.8<br>6 | 0.8<br>4 | N<br>A   | 0.9<br>2 | 0.8<br>8 | 0.9<br>4 | 0.9<br>2 | NA       | 0.8<br>5 | NA       | N<br>A   |
| cg04317854+cg17569<br>154+cg19260663 | 0.9<br>0 | 0.8<br>6 | N<br>A   | 0.8<br>5 | 0.9<br>6 | 0.8<br>6 | 0.9<br>5 | 0.8<br>9 | 0.9<br>1 | 0.9<br>4 | 0.8<br>4 | 0.8<br>2 | NA       | 0.9<br>0 |

|                                      |          |          |          |          |          |          |          |          |          |          |          |          |    |          |
|--------------------------------------|----------|----------|----------|----------|----------|----------|----------|----------|----------|----------|----------|----------|----|----------|
| cg04317854+cg17569<br>154+cg24805239 | N<br>A   | 0.8<br>7 | 0.<br>90 | N<br>A   | 0.9<br>6 | 0.8<br>3 | 0.9<br>4 | 0.8<br>5 | 0.9<br>1 | 0.9<br>0 | 0.8<br>2 | 0.8<br>7 | NA | N<br>A   |
| cg04317854+cg17569<br>154+cg26712096 | 0.8<br>6 | 0.8<br>6 | N<br>A   | N<br>A   | 0.9<br>6 | 0.8<br>2 | 0.9<br>5 | 0.8<br>7 | 0.9<br>2 | 0.9<br>2 | 0.8<br>4 | 0.8<br>3 | NA | 0.9<br>2 |
| cg04317854+cg19260<br>663+cg19706795 | 0.9<br>0 | 0.9<br>3 | 0.<br>86 | 0.8<br>2 | 0.8<br>6 | N<br>A   | 0.9<br>1 | 0.8<br>8 | 0.9<br>2 | 0.9<br>3 | 0.8<br>2 | 0.8<br>4 | NA | N<br>A   |
| cg04317854+cg19260<br>663+cg20764575 | 0.9<br>2 | 0.9<br>3 | N<br>A   | 0.8<br>6 | 0.8<br>6 | N<br>A   | 0.9<br>2 | 0.9<br>0 | 0.9<br>4 | 0.9<br>2 | NA       | 0.8<br>2 | NA | N<br>A   |
| cg04317854+cg19260<br>663+cg24805239 | 0.9<br>1 | 0.9<br>1 | 0.<br>93 | 0.8<br>2 | 0.8<br>1 | N<br>A   | 0.9<br>1 | 0.8<br>7 | 0.9<br>1 | 0.9<br>2 | NA       | 0.9<br>1 | NA | N<br>A   |
| cg04317854+cg19260<br>663+cg25723149 | 0.9<br>0 | 0.9<br>2 | 0.<br>84 | 0.8<br>4 | NA       | N<br>A   | 0.9<br>2 | 0.8<br>7 | 0.9<br>0 | 0.9<br>3 | 0.8<br>3 | 0.8<br>9 | NA | N<br>A   |
| cg04317854+cg19260<br>663+cg26712096 | 0.9<br>2 | 0.8<br>9 | N<br>A   | N<br>A   | 0.9<br>0 | N<br>A   | 0.9<br>3 | 0.8<br>6 | 0.9<br>2 | 0.9<br>4 | 0.8<br>3 | 0.8<br>5 | NA | N<br>A   |
| cg04317854+cg24805<br>239+cg26712096 | 0.8<br>8 | 0.9<br>1 | 0.<br>89 | N<br>A   | 0.8<br>9 | N<br>A   | 0.9<br>3 | 0.8<br>1 | 0.9<br>2 | 0.9<br>1 | 0.8<br>1 | 0.9<br>2 | NA | 0.8<br>1 |
| cg17569154+cg19260<br>663+cg20764575 | 0.9<br>0 | 0.9<br>3 | N<br>A   | N<br>A   | 0.9<br>4 | 0.8<br>7 | 0.8<br>9 | 0.9<br>2 | 0.8<br>8 | 0.8<br>5 | 0.8<br>0 | 0.8<br>1 | NA | 0.9<br>2 |

**Table S3.** Summary of the RNA-seq expression levels in the different sample types and across the different tumour types.

| Sample Type | Tumour Type | N    | Mean  | SD    |
|-------------|-------------|------|-------|-------|
| NT          | BLCA        | 19   | 8.506 | 0.982 |
| NT          | BRCA        | 113  | 8.206 | 0.448 |
| NT          | CRC         | 51   | 5.885 | 1.213 |
| NT          | ESCA        | 11   | 7.226 | 1.220 |
| NT          | HNSC        | 44   | 7.516 | 0.830 |
| NT          | KIRC        | 72   | 8.914 | 0.405 |
| NT          | KIRP        | 32   | 8.781 | 0.510 |
| NT          | LIHC        | 50   | 7.122 | 0.558 |
| NT          | LUAD        | 59   | 7.507 | 0.731 |
| NT          | LUSC        | 51   | 7.623 | 0.544 |
| NT          | PAAD        | 4    | 8.740 | 1.095 |
| NT          | PRAD        | 52   | 7.636 | 0.715 |
| NT          | THCA        | 59   | 9.004 | 0.379 |
| NT          | UCEC        | 24   | 9.132 | 0.766 |
| TP          | BLCA        | 408  | 7.709 | 1.854 |
| TP          | BRCA        | 1095 | 7.156 | 0.852 |
| TP          | CRC         | 379  | 5.515 | 1.494 |
| TP          | ESCA        | 184  | 7.419 | 2.023 |
| TP          | HNSC        | 520  | 9.422 | 1.275 |
| TP          | KIRC        | 533  | 8.753 | 0.945 |
| TP          | KIRP        | 290  | 9.376 | 1.169 |
| TP          | LIHC        | 371  | 7.121 | 1.799 |
| TP          | LUAD        | 515  | 7.676 | 1.315 |
| TP          | LUSC        | 502  | 8.536 | 1.302 |
| TP          | PAAD        | 178  | 7.963 | 1.037 |
| TP          | PRAD        | 497  | 6.718 | 0.868 |
| TP          | THCA        | 505  | 8.873 | 0.674 |
| TP          | UCEC        | 176  | 7.021 | 1.211 |

TP = primary tumour, NT = normal tissue, N = sample size, SD= standard deviation.



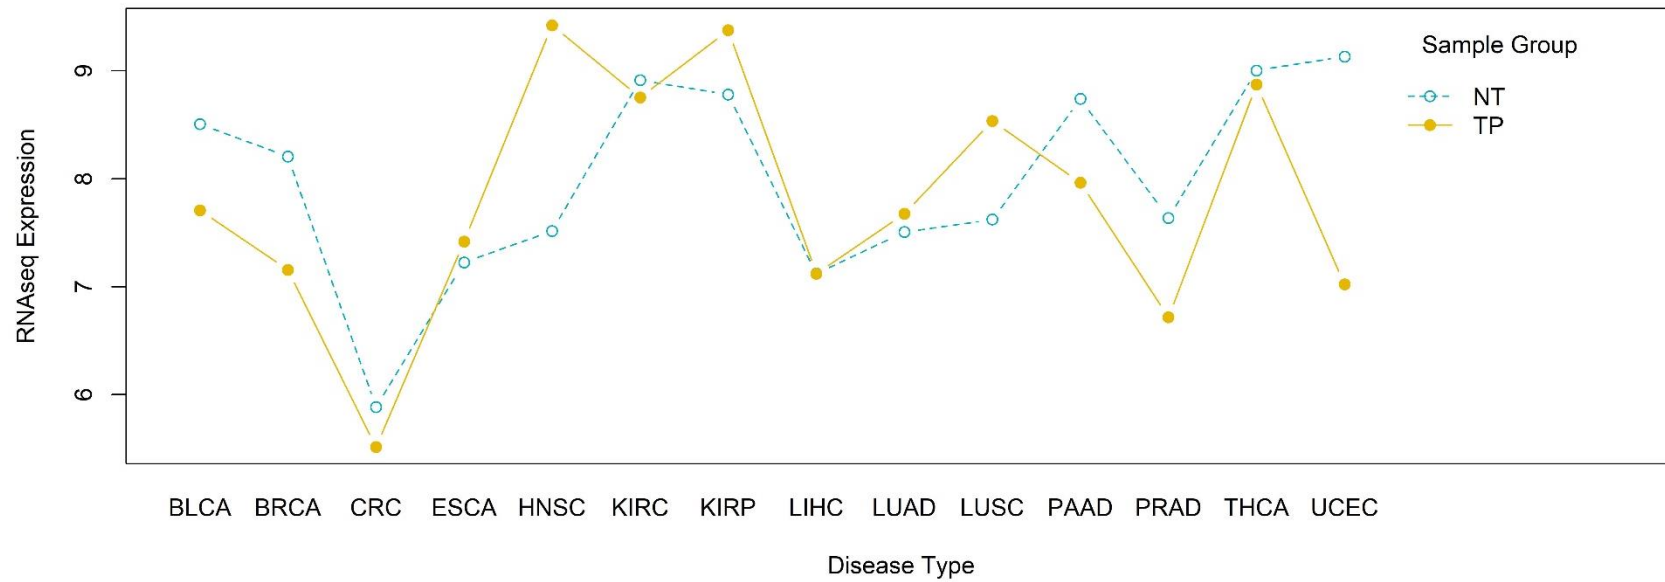

**Figure S1.** Interaction plot for the RNA-seq expression data showing the differences in expression levels between tumour and normal samples across the different tumour types.

**Table S4.** Table of the linear regression results for the analysis of RNA-seq expression and methylation.

| probes         | BLCA_s<br>lope | BLCA_p-<br>value | BRCA_s<br>lope | BRCA_p-<br>value | CRC_sl<br>ope | CRC_p-<br>value | ESCA_sl<br>ope | ESCA_p-<br>value | HNSC_s<br>lope | HNSC_p-<br>value | KIRC_sl<br>ope | KIRC_p-<br>value | KIRP_sl<br>ope | KIRP_p-<br>value |
|----------------|----------------|------------------|----------------|------------------|---------------|-----------------|----------------|------------------|----------------|------------------|----------------|------------------|----------------|------------------|
| cg0047<br>3134 | 0.087          | 0.848            | 0.005          | 0.986            | 0.044         | 0.929           | -0.182         | 0.813            | -1.527         | 0.038            | 0.146          | 0.783            | -0.205         | 0.769            |
| cg0173<br>3570 | 1.498          | 0.021            | -0.063         | 0.850            | 0.304         | 0.523           | 2.181          | 0.101            | 3.180          | 0.037            | 0.945          | 0.583            | 6.252          | 0.033            |
| cg0399<br>5857 | 2.121          | 0.000            | 0.373          | 0.182            | -1.684        | 0.011           | 0.548          | 0.558            | 0.643          | 0.367            | 0.738          | 0.003            | 1.538          | 0.000            |
| cg0431<br>7854 | 1.027          | 0.131            | -0.133         | 0.650            | -0.366        | 0.422           | 1.493          | 0.175            | 2.541          | 0.001            | -0.356         | 0.620            | -3.556         | 0.010            |
| cg0477<br>0504 | -0.533         | 0.155            | 0.048          | 0.828            | 0.385         | 0.358           | -0.492         | 0.388            | -1.578         | 0.000            | -1.823         | 0.000            | -0.802         | 0.003            |

|                |        |       |        |       |        |       |        |       |        |       |        |       |        |       |
|----------------|--------|-------|--------|-------|--------|-------|--------|-------|--------|-------|--------|-------|--------|-------|
| cg0630<br>1139 | 0.932  | 0.106 | 0.794  | 0.009 | 0.646  | 0.220 | 0.046  | 0.970 | 1.274  | 0.262 | 0.163  | 0.877 | -0.445 | 0.630 |
| cg0729<br>3520 | -1.864 | 0.030 | -0.365 | 0.145 | -0.703 | 0.269 | -3.696 | 0.021 | 0.048  | 0.960 | 0.293  | 0.699 | -3.137 | 0.002 |
| cg0732<br>0646 | -2.580 | 0.020 | 0.183  | 0.519 | -0.679 | 0.238 | 1.695  | 0.313 | -6.696 | 0.004 | -1.751 | 0.406 | 5.594  | 0.019 |
| cg0750<br>4598 | -0.206 | 0.846 | -0.108 | 0.679 | -0.385 | 0.449 | -1.136 | 0.674 | 6.051  | 0.013 | -4.141 | 0.065 | -6.629 | 0.012 |
| cg0933<br>3471 | 0.995  | 0.287 | 0.245  | 0.377 | -0.569 | 0.285 | -2.871 | 0.331 | -4.243 | 0.048 | 7.867  | 0.292 | 1.514  | 0.396 |
| cg1292<br>2093 | 0.075  | 0.949 | -0.113 | 0.753 | 0.781  | 0.184 | 0.986  | 0.631 | 1.286  | 0.413 | -9.407 | 0.114 | -4.466 | 0.468 |
| cg1420<br>5998 | -0.067 | 0.951 | 0.563  | 0.114 | 1.424  | 0.076 | 5.632  | 0.132 | -0.150 | 0.955 | -3.402 | 0.370 | 9.273  | 0.250 |
| cg1503<br>7663 | 0.954  | 0.395 | -0.353 | 0.307 | -0.350 | 0.667 | -1.620 | 0.511 | -0.221 | 0.914 | 2.028  | 0.208 | -6.609 | 0.022 |
| cg1756<br>9154 | -1.132 | 0.088 | 0.371  | 0.162 | 0.485  | 0.468 | 2.400  | 0.057 | 0.312  | 0.753 | -0.273 | 0.538 | 0.664  | 0.276 |
| cg1779<br>0129 | -1.823 | 0.095 | -0.951 | 0.025 | -0.962 | 0.287 | -0.902 | 0.673 | -1.314 | 0.366 | -2.581 | 0.000 | 1.891  | 0.049 |
| cg1926<br>0663 | 1.146  | 0.316 | 0.130  | 0.736 | -0.397 | 0.616 | -6.030 | 0.005 | -2.180 | 0.161 | 2.176  | 0.003 | -1.942 | 0.063 |
| cg1970<br>6795 | -1.087 | 0.072 | -0.254 | 0.399 | 0.633  | 0.202 | -0.113 | 0.914 | 0.338  | 0.544 | 0.511  | 0.259 | 0.245  | 0.601 |
| cg2076<br>4575 | 0.436  | 0.596 | 0.489  | 0.112 | -0.354 | 0.568 | 2.244  | 0.133 | 0.492  | 0.528 | 0.633  | 0.360 | 0.855  | 0.219 |
| cg2280<br>4000 | -0.205 | 0.870 | -0.093 | 0.830 | 0.334  | 0.684 | -0.316 | 0.870 | 0.600  | 0.535 | -0.152 | 0.830 | -1.327 | 0.139 |
| cg2480<br>5239 | 0.403  | 0.637 | -0.362 | 0.258 | -2.086 | 0.021 | 0.937  | 0.523 | 0.124  | 0.875 | -0.313 | 0.337 | -0.459 | 0.404 |
| cg2572<br>3149 | 1.277  | 0.146 | -0.085 | 0.792 | 0.746  | 0.180 | -2.661 | 0.027 | -2.412 | 0.000 | -2.560 | 0.012 | -4.202 | 0.076 |
| cg2671<br>2096 | 1.136  | 0.034 | 0.667  | 0.019 | 2.781  | 0.000 | 1.357  | 0.120 | 3.547  | 0.000 | 3.766  | 0.007 | 1.169  | 0.454 |

| probes         | LIHC_sl<br>ope | LIHC_p-<br>value | LUAD_s<br>lope | LUAD_p-<br>value | LUSC_s<br>lope | LUSC_p-<br>value | PAAD_s<br>lope | PAAD_p-<br>value | PRAD_s<br>lope | PRAD_p-<br>value | THCA_s<br>lope | THCA_p-<br>value | UCEC_s<br>lope | UCEC_p-<br>value |
|----------------|----------------|------------------|----------------|------------------|----------------|------------------|----------------|------------------|----------------|------------------|----------------|------------------|----------------|------------------|
| cg0047<br>3134 | -2.917         | 0.000            | 0.459          | 0.512            | -1.923         | 0.024            | 0.005          | 0.992            | -0.170         | 0.896            | -0.017         | 0.972            | 1.299          | 0.054            |
| cg0173<br>3570 | 0.782          | 0.468            | -0.590         | 0.528            | 0.322          | 0.754            | 4.814          | 0.016            | -0.083         | 0.952            | -1.810         | 0.149            | -2.340         | 0.367            |
| cg0399<br>5857 | 1.453          | 0.005            | 1.462          | 0.006            | 2.465          | 0.000            | 0.679          | 0.280            | 0.601          | 0.090            | 0.408          | 0.030            | -0.005         | 0.994            |
| cg0431<br>7854 | 0.740          | 0.204            | 0.063          | 0.920            | 1.727          | 0.035            | 0.791          | 0.174            | -0.818         | 0.081            | -0.645         | 0.283            | 0.663          | 0.618            |
| cg0477<br>0504 | -0.514         | 0.461            | -0.639         | 0.298            | -1.173         | 0.039            | 1.048          | 0.064            | -0.329         | 0.495            | -3.435         | 0.053            | -2.043         | 0.021            |
| cg0630<br>1139 | -0.699         | 0.214            | 2.124          | 0.004            | 1.610          | 0.075            | 1.603          | 0.013            | 0.652          | 0.091            | 1.764          | 0.059            | 2.265          | 0.017            |
| cg0729<br>3520 | -1.598         | 0.000            | -1.525         | 0.068            | -2.353         | 0.016            | -1.803         | 0.017            | -0.293         | 0.441            | 0.117          | 0.697            | -2.561         | 0.002            |
| cg0732<br>0646 | 0.024          | 0.969            | -0.002         | 0.999            | 0.988          | 0.702            | -0.184         | 0.830            | -0.020         | 0.954            | -2.153         | 0.137            | 0.714          | 0.691            |
| cg0750<br>4598 | -0.826         | 0.130            | -0.944         | 0.286            | -2.938         | 0.206            | 1.149          | 0.126            | -0.112         | 0.726            | 1.390          | 0.367            | -2.677         | 0.102            |
| cg0933<br>3471 | 0.148          | 0.904            | 0.759          | 0.366            | -9.670         | 0.173            | 4.161          | 0.001            | -1.840         | 0.212            | 0.251          | 0.952            | 1.412          | 0.599            |
| cg1292<br>2093 | 4.882          | 0.022            | 0.220          | 0.845            | 9.063          | 0.279            | -6.404         | 0.001            | -0.154         | 0.918            | -1.629         | 0.669            | 0.280          | 0.926            |
| cg1420<br>5998 | -1.054         | 0.522            | -1.217         | 0.140            | 2.376          | 0.539            | 1.186          | 0.265            | 0.462          | 0.305            | -3.949         | 0.185            | -4.399         | 0.035            |
| cg1503<br>7663 | 0.317          | 0.792            | 0.512          | 0.617            | 1.523          | 0.545            | -2.541         | 0.020            | 0.531          | 0.239            | -1.191         | 0.025            | 4.664          | 0.030            |
| cg1756<br>9154 | -0.532         | 0.437            | 0.971          | 0.244            | -2.088         | 0.052            | -0.316         | 0.627            | 0.083          | 0.930            | 0.396          | 0.024            | -1.683         | 0.200            |
| cg1779<br>0129 | -1.223         | 0.308            | 0.836          | 0.549            | -0.585         | 0.710            | -0.227         | 0.861            | -0.516         | 0.583            | -0.903         | 0.012            | -1.016         | 0.614            |
| cg1926<br>0663 | -1.284         | 0.277            | -2.277         | 0.138            | 0.862          | 0.629            | -0.822         | 0.508            | -1.116         | 0.241            | -0.288         | 0.382            | 2.222          | 0.350            |

|                |        |       |        |       |        |       |        |       |        |       |        |       |        |       |
|----------------|--------|-------|--------|-------|--------|-------|--------|-------|--------|-------|--------|-------|--------|-------|
| cg1970<br>6795 | 1.037  | 0.137 | -0.392 | 0.575 | 0.300  | 0.741 | 0.897  | 0.210 | -0.012 | 0.984 | -0.026 | 0.850 | -1.074 | 0.299 |
| cg2076<br>4575 | 0.456  | 0.580 | 2.810  | 0.001 | -1.000 | 0.438 | -1.236 | 0.145 | -0.812 | 0.368 | 0.105  | 0.508 | -0.648 | 0.714 |
| cg2280<br>4000 | 0.329  | 0.718 | -2.476 | 0.062 | 0.568  | 0.689 | 0.853  | 0.480 | -3.490 | 0.001 | -0.582 | 0.049 | -1.430 | 0.483 |
| cg2480<br>5239 | 0.583  | 0.315 | -2.617 | 0.003 | 1.681  | 0.100 | -3.444 | 0.001 | -0.769 | 0.429 | 0.036  | 0.891 | 2.851  | 0.023 |
| cg2572<br>3149 | -1.824 | 0.002 | 0.977  | 0.366 | -0.993 | 0.216 | -2.305 | 0.175 | 1.593  | 0.484 | -4.789 | 0.040 | 1.485  | 0.292 |
| cg2671<br>2096 | 4.227  | 0.000 | 1.572  | 0.029 | 1.810  | 0.019 | 3.199  | 0.002 | 0.930  | 0.012 | 0.987  | 0.289 | 1.683  | 0.125 |

Highlighted cells represent significant *p*-values.

**Table S5** Table of the linear regression results for the analysis of age and methylation.

| Probe          | BLCA<br>_slope | BLCA_lm<br>_p_value | BRCA<br>_slope | BRCA_lm<br>_p_value | CRC_s<br>lope | CRC_lm_<br>p_value | ESCA_<br>slope | ESCA_lm<br>_p_value | HNSC<br>_slope | HNSC_lm<br>_p_value | KIRC_<br>slope | KIRC_lm<br>_p_value | KIRP_<br>slope | KIRP_lm_<br>p_value |
|----------------|----------------|---------------------|----------------|---------------------|---------------|--------------------|----------------|---------------------|----------------|---------------------|----------------|---------------------|----------------|---------------------|
| cg004<br>73134 | 3.88E-04       | 4.49E-01            | 1.05E-03       | 5.69E-03            | 3.79E-03      | 5.51E-08           | 3.88E-03       | 2.75E-03            | 1.84E-04       | 1.07E-01            | -3.74E-05      | 5.64E-01            | -1.89E-03      | 2.49E-05            |
| cg017<br>33570 | 1.20E-03       | 1.31E-01            | 7.59E-04       | 1.33E-01            | 2.91E-03      | 5.03E-05           | 2.96E-03       | 3.02E-02            | 1.64E-03       | 1.32E-03            | 4.38E-05       | 9.27E-01            | -9.22E-04      | 2.89E-01            |
| cg039<br>95857 | 6.49E-04       | 3.30E-01            | 1.62E-03       | 2.41E-03            | 3.54E-03      | 9.25E-05           | 5.40E-03       | 1.66E-03            | 2.23E-04       | 6.48E-02            | 2.17E-05       | 7.45E-01            | -1.96E-03      | 3.18E-05            |
| cg043<br>17854 | -1.73E-03      | 4.54E-02            | -2.75E-04      | 5.58E-01            | 7.09E-04      | 8.58E-02           | -3.01E-04      | 6.82E-01            | -7.67E-05      | 8.07E-01            | 1.55E-03       | 5.72E-03            | 1.56E-03       | 3.69E-02            |
| cg047<br>70504 | 7.40E-04       | 2.79E-01            | 1.76E-03       | 1.26E-04            | 2.12E-03      | 3.92E-03           | 3.54E-03       | 6.70E-03            | -8.93E-05      | 4.64E-01            | 5.69E-05       | 1.62E-01            | -1.31E-03      | 1.16E-04            |
| cg063<br>01139 | -9.05E-04      | 7.06E-02            | -1.18E-04      | 7.49E-01            | 3.14E-04      | 5.38E-01           | -1.04E-03      | 8.63E-02            | 1.24E-03       | 2.22E-02            | -1.09E-04      | 4.42E-01            | 7.91E-05       | 4.29E-01            |
| cg072<br>93520 | 2.48E-04       | 6.81E-01            | 1.31E-03       | 1.74E-03            | 4.52E-03      | 2.27E-07           | 4.72E-03       | 3.63E-03            | -1.51E-05      | 9.09E-01            | 1.02E-05       | 6.44E-01            | -1.80E-03      | 4.56E-05            |
| cg073<br>20646 | 1.00E-04       | 9.03E-01            | 2.23E-03       | 1.88E-04            | 5.14E-03      | 1.24E-06           | 5.12E-03       | 6.90E-03            | -3.57E-05      | 7.95E-01            | -1.62E-05      | 4.08E-01            | -1.93E-03      | 2.35E-04            |
| cg075<br>04598 | -1.08E-03      | 1.33E-01            | 8.08E-04       | 9.32E-02            | 1.87E-03      | 1.96E-03           | 2.53E-03       | 2.55E-02            | 1.95E-03       | 1.74E-03            | 1.28E-04       | 7.76E-01            | -1.80E-03      | 4.73E-02            |

|              |                   |                        |                   |                        |                   |                        |                   |                        |                   |                        |                   |                        |                   |                        |
|--------------|-------------------|------------------------|-------------------|------------------------|-------------------|------------------------|-------------------|------------------------|-------------------|------------------------|-------------------|------------------------|-------------------|------------------------|
| cg09333471   | 6.84E-04          | 2.51E-01               | 8.97E-04          | 2.73E-02               | 3.10E-03          | 3.80E-06               | 3.71E-03          | 4.54E-03               | 2.18E-04          | 4.32E-01               | -8.88E-05         | 6.91E-01               | -9.87E-04         | 4.85E-02               |
| cg12922093   | -1.54E-03         | 8.15E-02               | -8.07E-04         | 1.30E-01               | 1.17E-04          | 8.57E-01               | -1.93E-03         | 1.25E-02               | -4.62E-04         | 1.15E-01               | -1.58E-04         | 4.05E-01               | 5.70E-05          | 7.56E-01               |
| cg14205998   | -5.72E-04         | 5.04E-01               | -6.37E-04         | 2.15E-01               | 4.23E-05          | 9.45E-01               | -7.10E-04         | 3.43E-01               | -7.73E-05         | 6.20E-01               | -1.22E-04         | 1.61E-01               | 9.17E-06          | 9.12E-01               |
| cg15037663   | -1.81E-03         | 1.01E-02               | -3.06E-04         | 5.31E-01               | 1.66E-03          | 5.11E-03               | 1.25E-03          | 2.20E-01               | 2.22E-03          | 5.62E-04               | -9.67E-05         | 8.18E-01               | -1.54E-03         | 6.27E-02               |
| cg17569154   | 2.18E-03          | 3.02E-02               | -8.48E-04         | 1.05E-01               | 1.34E-04          | 8.40E-01               | -4.15E-03         | 2.10E-03               | 6.43E-04          | 3.20E-01               | 3.72E-04          | 3.58E-01               | -7.03E-04         | 4.45E-01               |
| cg17790129   | -4.73E-04         | 6.15E-01               | -1.18E-03         | 3.88E-02               | 1.16E-04          | 8.32E-01               | -2.14E-03         | 1.65E-02               | 3.88E-04          | 1.54E-01               | 1.35E-04          | 5.45E-01               | -2.07E-04         | 5.43E-01               |
| cg19260663   | -4.88E-04         | 5.92E-01               | -9.77E-04         | 4.84E-02               | 7.03E-04          | 1.80E-01               | -6.48E-04         | 3.89E-01               | -4.15E-05         | 8.29E-01               | 3.18E-04          | 1.33E-02               | 1.14E-04          | 6.24E-01               |
| cg19706795   | -1.51E-03         | 1.06E-02               | 3.24E-05          | 9.42E-01               | 7.27E-04          | 1.22E-01               | 4.69E-04          | 5.92E-01               | 1.78E-03          | 4.63E-03               | -3.06E-04         | 4.98E-01               | -2.12E-03         | 1.61E-02               |
| cg20764575   | -1.09E-03         | 5.13E-02               | 5.78E-04          | 1.99E-01               | 8.77E-04          | 6.30E-03               | 6.99E-04          | 4.66E-01               | 2.37E-03          | 4.61E-04               | 1.88E-04          | 7.45E-01               | -2.18E-03         | 1.58E-02               |
| cg22804000   | 1.72E-04          | 8.24E-01               | 1.27E-03          | 9.07E-03               | 2.40E-03          | 3.83E-04               | 4.27E-03          | 1.43E-03               | 1.43E-03          | 1.31E-03               | 6.24E-04          | 1.58E-01               | -1.33E-03         | 1.10E-01               |
| cg24805239   | 6.54E-04          | 3.14E-01               | 1.86E-03          | 2.81E-05               | 3.59E-03          | 1.31E-05               | 4.10E-03          | 5.38E-03               | 2.34E-04          | 1.02E-01               | 1.58E-04          | 1.34E-01               | -1.43E-03         | 6.31E-04               |
| cg25723149   | 6.83E-04          | 4.19E-01               | 1.88E-03          | 3.85E-04               | 3.13E-03          | 4.49E-06               | 4.54E-03          | 2.37E-03               | 1.55E-03          | 7.48E-04               | 8.26E-04          | 8.71E-02               | -1.39E-03         | 9.97E-02               |
| cg26712096   | 5.25E-04          | 5.61E-01               | -1.53E-03         | 5.00E-03               | -1.28E-03         | 7.17E-02               | -2.33E-03         | 3.75E-02               | 8.06E-04          | 6.54E-02               | -1.56E-05         | 8.86E-01               | 1.45E-04          | 4.10E-01               |
| <b>Probe</b> | <b>LIHC_slope</b> | <b>LIHC_lm_p_value</b> | <b>LUAD_slope</b> | <b>LUAD_lm_p_value</b> | <b>LUSC_slope</b> | <b>LUSC_lm_p_value</b> | <b>PAAD_slope</b> | <b>PAAD_lm_p_value</b> | <b>PRAD_slope</b> | <b>PRAD_lm_p_value</b> | <b>THCA_slope</b> | <b>THCA_lm_p_value</b> | <b>UCEC_slope</b> | <b>UCEC_lm_p_value</b> |
| cg00473134   | 7.80E-04          | 1.45E-01               | 1.52E-04          | 7.39E-01               | 3.20E-04          | 1.44E-01               | 2.24E-04          | 7.93E-01               | 3.71E-03          | 6.24E-05               | 1.50E-04          | 2.30E-02               | 2.20E-04          | 6.98E-01               |
| cg01733570   | -1.72E-03         | 2.57E-02               | 5.90E-04          | 2.84E-01               | -1.84E-03         | 4.54E-02               | 2.60E-04          | 8.14E-01               | -3.55E-05         | 9.49E-01               | 1.04E-03          | 3.29E-02               | -1.12E-03         | 2.18E-01               |
| cg03995857   | 1.24E-03          | 2.95E-02               | 1.47E-04          | 8.14E-01               | 2.46E-04          | 3.32E-01               | 1.24E-04          | 9.04E-01               | 3.83E-03          | 5.62E-05               | 1.84E-04          | 9.86E-04               | 6.48E-05          | 9.24E-01               |
| cg04317854   | -9.43E-04         | 1.16E-01               | 1.02E-03          | 5.00E-02               | -1.26E-03         | 9.04E-02               | 9.09E-04          | 1.72E-01               | 9.42E-04          | 1.55E-01               | 6.84E-04          | 4.78E-02               | -1.43E-03         | 4.07E-02               |
| cg04770504   | 3.13E-04          | 2.07E-01               | 5.64E-04          | 3.81E-01               | 2.10E-04          | 2.26E-01               | 3.63E-04          | 6.20E-01               | 3.06E-03          | 1.32E-04               | 9.92E-05          | 1.14E-03               | 4.13E-04          | 4.65E-01               |

|             |           |          |           |          |           |          |           |          |           |          |           |          |           |          |
|-------------|-----------|----------|-----------|----------|-----------|----------|-----------|----------|-----------|----------|-----------|----------|-----------|----------|
| cg063-01139 | -8.45E-04 | 1.34E-01 | -1.11E-04 | 7.26E-01 | -4.68E-04 | 4.50E-01 | 2.07E-04  | 3.96E-01 | -1.10E-04 | 2.76E-01 | 4.57E-05  | 1.25E-01 | -6.87E-04 | 1.12E-01 |
| cg072-93520 | 1.98E-04  | 1.98E-01 | 6.85E-04  | 2.04E-01 | 3.03E-04  | 1.28E-01 | 2.12E-04  | 6.37E-01 | 9.60E-04  | 5.06E-04 | 3.21E-05  | 7.67E-02 | 7.89E-04  | 1.41E-01 |
| cg073-20646 | 4.59E-04  | 1.31E-01 | 6.90E-04  | 3.26E-01 | 3.68E-04  | 9.62E-02 | 3.57E-04  | 5.94E-01 | 5.63E-04  | 3.51E-02 | -1.08E-06 | 9.54E-01 | 7.80E-04  | 2.09E-01 |
| cg075-04598 | -2.34E-03 | 2.97E-03 | -1.70E-05 | 9.74E-01 | -1.01E-03 | 2.66E-01 | 5.02E-04  | 5.44E-01 | 7.01E-04  | 2.88E-01 | 1.45E-03  | 2.47E-03 | -2.66E-04 | 7.49E-01 |
| cg093-33471 | 1.36E-03  | 4.08E-02 | 2.22E-04  | 6.56E-01 | 1.44E-04  | 7.52E-01 | 1.28E-03  | 1.16E-01 | 2.73E-03  | 3.80E-03 | 2.87E-04  | 2.39E-01 | -1.03E-04 | 8.83E-01 |
| cg129-22093 | -3.34E-03 | 2.62E-06 | 1.63E-04  | 7.75E-01 | -6.40E-04 | 2.48E-01 | 1.71E-03  | 1.68E-02 | -1.58E-03 | 1.46E-02 | 8.37E-05  | 4.69E-01 | -3.23E-04 | 4.33E-01 |
| cg142-05998 | 9.27E-05  | 6.59E-01 | 2.01E-04  | 5.85E-01 | 2.04E-05  | 9.67E-01 | 4.80E-05  | 8.17E-01 | -2.40E-04 | 1.35E-01 | -6.59E-05 | 2.23E-01 | 1.07E-04  | 5.74E-01 |
| cg150-37663 | -3.37E-03 | 2.71E-05 | -1.26E-04 | 7.96E-01 | -8.96E-04 | 3.46E-01 | 6.76E-04  | 3.58E-01 | 4.89E-05  | 9.22E-01 | 1.19E-03  | 1.08E-02 | -1.44E-04 | 8.64E-01 |
| cg175-69154 | -1.21E-03 | 3.65E-02 | 2.97E-04  | 5.02E-01 | -7.88E-04 | 2.78E-01 | 1.06E-03  | 2.08E-01 | -6.23E-04 | 2.17E-01 | -2.43E-05 | 5.67E-01 | 1.20E-04  | 7.81E-01 |
| cg177-90129 | 6.81E-04  | 1.30E-02 | 2.00E-04  | 6.58E-01 | -7.85E-04 | 9.68E-02 | -8.27E-04 | 2.98E-01 | 1.29E-04  | 4.22E-01 | -1.37E-05 | 9.12E-01 | -1.97E-03 | 5.55E-04 |
| cg192-60663 | -3.11E-03 | 3.33E-05 | 8.65E-04  | 8.19E-02 | 2.86E-04  | 6.08E-01 | 8.54E-04  | 2.21E-01 | -2.16E-03 | 7.24E-03 | -1.35E-04 | 1.41E-01 | 2.09E-04  | 6.63E-01 |
| cg197-06795 | -3.00E-03 | 8.73E-05 | 1.37E-04  | 7.26E-01 | -8.23E-04 | 3.41E-01 | -3.66E-05 | 9.49E-01 | -4.53E-04 | 1.99E-01 | 5.32E-04  | 3.55E-02 | -2.46E-04 | 7.64E-01 |
| cg207-64575 | -3.42E-03 | 4.92E-05 | 2.70E-05  | 9.44E-01 | -1.19E-04 | 8.97E-01 | 7.56E-04  | 2.00E-01 | -2.72E-04 | 4.54E-01 | 2.77E-04  | 2.82E-01 | -1.42E-03 | 1.31E-01 |
| cg228-04000 | -1.32E-03 | 7.73E-02 | 1.12E-03  | 3.49E-02 | -1.53E-03 | 6.20E-02 | 2.93E-04  | 7.74E-01 | 1.31E-04  | 8.58E-01 | 1.73E-03  | 1.40E-04 | -6.78E-04 | 4.35E-01 |
| cg248-05239 | 3.52E-04  | 2.64E-01 | 9.45E-04  | 1.09E-01 | 3.81E-04  | 1.26E-01 | 5.95E-04  | 4.42E-01 | 3.72E-03  | 9.18E-05 | 8.30E-04  | 4.26E-09 | -4.47E-07 | 9.99E-01 |
| cg257-23149 | -9.22E-04 | 2.30E-01 | 9.39E-04  | 1.01E-01 | -1.15E-03 | 1.82E-01 | 3.41E-04  | 7.46E-01 | 4.22E-04  | 5.57E-01 | 1.61E-03  | 2.83E-04 | -1.06E-03 | 2.44E-01 |
| cg267-12096 | -2.00E-03 | 3.94E-03 | 3.45E-04  | 4.97E-01 | 8.51E-05  | 9.11E-01 | 4.06E-04  | 3.15E-01 | -8.35E-04 | 2.23E-01 | -6.21E-05 | 4.13E-01 | 8.78E-04  | 1.54E-01 |

Highlighted cells represent significant  $p$ -values.

**R packages used:**

- 1 lme4 - Bates D, Mächler M, Bolker B, Walker S. Fitting Linear Mixed-Effects Models using lme4. *J. Stat. Softw.* **2014**, *67*(1), 51. doi:10.18637/jss.v067.i01.
- 2 Pbkrttest - Halekoh U, Højsgaard S. A Kenward-Roger Approximation and Parametric Bootstrap Methods for Tests in Linear Mixed Models - The R Package pbkrtest. *J. Stat. Softw.* **2014**, *59*(9), 1–32. doi:10.18637/jss.v059.i09.
- 3 Zhao J.H. Genetic Analysis Package. *J. Stat. Softw.* **2007**, *23*(8), 1–18. doi:http://dx.doi.org/10.18637/jss.v023.i08.
- 4 MASS–Venables, W.N. (William, N., Ripley, B.D.; Venables, W.N. (William, N.). *Modern Applied Statistics With S*. Vol 45. Fourth. New York: Springer; 2002. doi:10.1198/tech.2003.s33.
- 5 ROCR–Sing, T.; Sander, O.; Beerenwinkel, N.; Lengauer, T. ROCR: Visualizing classifier performance in R. *Bioinformatics*. 2005, *21*(20), 3940–3941. doi:10.1093/bioinformatics/bti623.
- 6 LeDell, E.; Petersen, M.; van der Laan, M. cvAUC: cross-validated area under the ROC curve confidence intervals. R package version. **2013**: 1-0.
- 7 Wickham, P.-H. The Split-Apply-Combine Strategy for Data Analysis. *J. Stat. Softw.* **2011**, *40*(1), 1–29. URL <http://www.jstatsoft.org/v40/i01/>.
